# Supplementary material for: Automated diagnosis of autism: State of the art
Source: bioRxiv or medRxiv preprint supplement (doi:10.1101/2021.06.29.21254249), 2023-03-29
Supplement: Supplementary file [file media-2.pdf]

# Multimedia Appendix 2: Characteristics of included studies

## rs-fMRI

| Parcellation <sup>1</sup>         | Feature Selection <sup>2</sup> | ASD/TD   | Validation | Accuracy | Sen/Spe   | Age | Classifier <sup>3</sup> | AI Spec <sup>4</sup> | Risk of bias | Reference |
|-----------------------------------|--------------------------------|----------|------------|----------|-----------|-----|-------------------------|----------------------|--------------|-----------|
| ROI-based functional connectivity |                                |          |            |          |           |     |                         |                      |              |           |
| AAL116                            | LLFS                           | 63/72*   | 70:30      | 97.5     | -         | B   | SVM                     | RBF kernel           | ✓✓✓✓         | [50]      |
| Self-generated                    | t test                         | 11/48*** | LOOCV      | 96.6     | 81.8/100  | A   | SVM                     | Linear kernel        | ✓✓✓?         | [51]      |
| AAL116                            | RFE-SSAE                       | 501/553* | 30-fold    | 94.9     | 94/95.6   | B+C | LR                      | Simple LR            | ×✓✓✓         | [52]      |
| RBS                               | AE                             | 155/148* | 10-fold    | 91.1     | 89.9/92   | B   | DRBM                    | -                    | ×✓✓✓         | [53]      |
| Power150                          | LLFS                           | 126/126* | 66:33      | 90.8     | 89/93     | B+C | Ensemble                | RF                   | ✓✓✓✓         | [54]      |
| Clements35                        | RFE                            | 255/276* | 10-fold    | 90.6     | 90.6/90.6 | B+C | SVM                     | Linear kernel        | ×✓✓✓         | [55]      |
| AAL90                             | Threshold                      | 312/328* | 50-fold    | 90.3     | 92.3/88.4 | B   | DNN                     | PNN                  | ×✓✓✓         | [56]      |
| -                                 | t test-MRMR-LLFS               | 23/27*   | 5-fold     | 89.7     | 87.6/92   | B+C | Ensemble                | -                    | ?××✓         | [57]      |
| AAL90                             | SMF-t test                     | 505/530* | 90:10      | 88       | 91.5/86.5 | B+C | SVM                     | Linear kernel        | ×✓×✓         | [58]      |
| Multi atlas                       | SLR                            | 159/197* | 10-fold    | 89.1     | 91/87.7   | B   | Ensemble                | -                    | ?✓✓✓         | [59]      |
| AAL116                            | None                           | 55/55*   | 5-fold     | 86.4     | -         | B   | AE + Softmax            | Stacked SAE          | ×✓×✓         | [60]      |
| Multi atlas                       | L1SCCA                         | 74/107   | LOOCV      | 85       | 80/89     | C   | LR                      | Sparse LR            | ✓✓×✓         | [61]      |
| HO110                             | None                           | 186/184* | 5-fold     | 84.9     | -         | -   | FCNN                    | -                    | ?✓✓✓         | [62]      |
| Whole brain                       | AE                             | 505/530* | 10-fold    | 84.1     | 80/75.3   | B+C | CNN                     | Standard             | ×✓✓✓         | [63]      |
| Multi atlas                       | FFS                            | 505/530* | 10-fold    | 83       | 83/84     | B+C | LR                      | Simple LR            | ×✓✓✓         | [64]      |
| Multi atlas                       | SLR                            | 36/46*   | 10-fold    | 81.7     | 71.8/89.5 | B+C | SVM                     | Linear kernel        | ?××✓         | [65]      |
| AAL116                            | t test                         | 45/47*   | LOOCV      | 81.5     | 84.4/78.7 | B   | SVM                     | Linear kernel        | ×✓✓✓         | [66]      |
| AAL90                             | Threshold                      | 443/435* | 90:10      | 81.1     | 80.4/81.7 | B+C | SVM                     | Gaussian kernel      | ×✓✓✓         | (16)      |
| AAL116                            | F score                        | 23/15*   | 62:38      | 80.8     | -         | -   | SVM                     | Linear kernel        | ?/?✓         | [68]      |
| DOS160                            | Extra tree                     | 403/468* | 10-fold    | 80.5     | 63.7/100  | B+C | SVM                     | Linear kernel        | ×✓✓✓         | [69]      |
| AAL116                            | LASSO                          | 539/573* | 85:15      | 79.6     | 83.6/75.6 | B+C | Ensemble                | -                    | ××✓✓         | [70]      |
| AAL116                            | LLFS-t test-RFE                | 45/47*   | LOOCV      | 79.4     | 82.2/76.6 | B   | SVM                     | Multi kernel         | ✓✓✓✓         | [71]      |
| CC400                             | None                           | 505/530* | 80:20      | 79.2     | 69.6/85   | B+C | CNN                     | AlexNet              | ×✓✓✓         | [72]      |
| Self-generated                    | F score                        | 112/128* | LOOCV      | 79.2     | 77.8/80.5 | B   | SVM                     | Linear kernel        | ×✓✓✓         | [73]      |
| Power150                          | Threshold                      | 403/468* | 10-fold    | 79.2     | -         | B+C | AE + Softmax            | -                    | ××✓✓         | [74]      |
| DES162                            | RFE                            | 59/59    | 10-fold    | 79.1     | 73.3/85   | C   | LR                      | Simple LR            | ✓✓×✓         | [75]      |
| Whole brain                       | t test                         | 40/40    | LOOCV      | 79       | 83/75     | B+C | LR                      | Simple LR            | ✓✓✓✓         | [76]      |
| AAL90                             | SMF                            | 505/530* | LOOCV      | 77.3     | -         | B+C | SVM                     | Gaussian kernel      | ×✓×✓         | [77]      |
| DK70                              | t test-RFE                     | 86/125*  | 10-fold    | 76.3     | 79.2/63.9 | B   | SVM                     | Linear kernel        | ?×✓✓         | [78]      |

|                  |              |            |          |      |           |     |              |                  |      |       |
|------------------|--------------|------------|----------|------|-----------|-----|--------------|------------------|------|-------|
| RBS              | None         | 505/530*   | 70:30    | 76   | 78/67     | B+C | AE + Softmax | Stacked SAE      | ×✓✓✓ | [79]  |
| CC400            | None         | 505/530*   | 10-fold  | 76   | 70/81.7   | B+C | CNN          | Self-proposed    | ×✓✓✓ | [80]  |
| CC400            | None         | 505/530*   | 5-fold   | 75.3 | 74/76.6   | B+C | FCNN         | -                | ×✓✓✓ | [81]  |
| SBC36            | LASSO        | 15/45      | LOOCV    | 75   | 76.7/73.3 | C   | LR           | Sparse LR        | ✓✓✓✓ | [82]  |
| Multi atlas      | None         | 419/530*   | 10-fold  | 74.5 | 80.7/66.7 | B+C | AE + Softmax | Stacked DAE      | ×✓✓✓ | [83]  |
| AAL116           | None         | 505/530*   | 90:10    | 74   | 94.9/69.9 | B+C | CNN          | ResNet-18 + FCNN | ×✓✓✓ | [84]  |
| Multi atlas      | None         | 300/300*   | 5-fold   | 72.5 | 71.7/73.3 | B   | Ensemble     | CRF + CNN        | ×✓✓✓ | [85]  |
| CC400            | None         | 505/530*   | 5-fold   | 72   | 70.9/73   | B+C | LR           | Ridge LR         | ×✓✓✓ | [86]  |
| CC200            | None         | 505/530*   | 10-fold  | 71   | 73/66     | B+C | DNN          | CapsNet          | ×?✓✓ | [87]  |
| HO110            | Threshold    | 102/88*    | LOOCV    | 71   | 69/74     | B   | SVM          | Linear kernel    | ×✓×✓ | [88]  |
| CC200            | None         | 505/530*   | 10-fold  | 71   | 71/71     | B+C | CNN          | Self-proposed    | ×✓✓✓ | [89]  |
| Power150         | LEAN-LLFS    | 387/436*   | 5-fold   | 70.9 | -         | B+C | FCNN         | -                | ×✓✓✓ | [90]  |
| CC200            | F score      | 505/530*   | 5-fold   | 70.9 | 70.7/75.5 | B+C | AE + Softmax | -                | ×✓✓✓ | [91]  |
| CC200            | None         | 505/530*   | 10-fold  | 70.8 | 62.2/79.1 | B+C | AE + Softmax | Stacked SAE      | ×✓✓✓ | [92]  |
| Power150         | None         | 126/126*   | 72:28    | 70.8 | -         | B+C | Ensemble     | CRF              | ×✓✓✓ | [93]  |
| CC200            | RFE          | 442/556*   | 80:20    | 70.7 | -         | B+C | SVM          | RBF kernel       | ×✓✓✓ | [94]  |
| DLA200           | SLR          | 100/100*   | 10-fold  | 70.5 | 74/67     | B+C | CNN          | Standard         | ?×✓✓ | [95]  |
| AAL90            | None         | 38/23*     | 5-fold   | 70.4 | 72.5/67   | B+C | AE + Softmax | Stacked SAE      | ✓✓×✓ | [96]  |
| CC200            | None         | 505/530*   | 5-fold   | 70.3 | 68.3/72.2 | B+C | AE + Softmax | -                | ×✓✓✓ | [97]  |
| CC400            | None         | 505/530*   | 10-fold  | 70.2 | 77.5/61.8 | B+C | CNN          | Standard         | ×✓✓✓ | [98]  |
| CC200            | RFE          | 432/556*   | 90:10    | 70.1 | -         | B+C | SVM          | Linear kernel    | ×✓✓✓ | [99]  |
| CC200            | None         | 505/530*   | 10-fold  | 70   | 74/63     | B+C | AE + Softmax | Stacked DAE      | ×✓✓✓ | [100] |
| Brodmann's areas | Elastic Nets | 167/205*   | 10-fold  | 70   | 65/75     | B   | SVM          | Linear kernel    | ×✓✓✓ | [101] |
| AAL116           | None         | 403/468*   | 5-fold   | 69.8 | 63.1/75.6 | B+C | FCNN         | -                | ×✓✓✓ | [102] |
| BASC64           | BOF          | 75/100*    | 5-fold   | 69.7 | 54.6/80.9 | B+C | SVM          | RBF kernel       | ×✓✓✓ | [103] |
| AAL116           | Masking      | 510/536*   | 5-fold   | 69.2 | 64.7/73.5 | B+C | AE + Softmax | Stacked SAE      | ××?✓ | [104] |
| AAL116           | SLR          | 250/218*   | 5-fold   | 69.1 | 70.2/66.4 | B+C | KNN          | -                | ×✓✓✓ | [105] |
| CC200            | Extra tree   | 506/548*   | 10-fold  | 67.7 | 66.3/68.9 | B+C | SVM          | Linear kernel    | ×✓✓✓ | [106] |
| AAL116           | t test       | 119/144*   | 10-fold  | 67.4 | 58.3/75   | B   | DRBM         | -                | ?×✓✓ | [107] |
| HBM-Bzdok12      | IBP          | 369/349*   | 90:10    | 67.3 | -         | B+C | SVM          | Linear kernel    | ✓✓✓✓ | [108] |
| DLA39            | MSDL         | 403/468*   | LOOCV    | 67   | 61/72.3   | B+C | SVM          | Linear kernel    | ×✓×✓ | [109] |
| AAL116           | None         | 1711/15903 | 70:15:15 | 67   | -         | All | Ensemble     | -                | ××✓✓ | [110] |
| HO110            | EIIC         | 539/573*   | LOOCV    | 67   | -         | B+C | Ensemble     | -                | ×✓×✓ | [111] |
| AAL90            | EW           | 527/569*   | 5-fold   | 66.9 | 66.4/70.4 | B+C | CNN          | Self-proposed    | ××✓✓ | [112] |
| Multi atlas      | None         | 200/200*   | 80:20    | 65   | 65/65     | B+C | Ensemble     | CRF              | ×✓✓✓ | [113] |
| AAL116           | LLFS         | 272/245*   | LOOCV    | 65   | -         | -   | SVM          | Linear kernel    | ?✓×✓ | [114] |

|             |             |          |         |      |           |     |     |                 |      |       |
|-------------|-------------|----------|---------|------|-----------|-----|-----|-----------------|------|-------|
| DOS160      | SDAE        | 457/483* | 10-fold | 64   | 63.8/64.4 | B+C | SVM | RBF kernel      | XXVV | [115] |
| CC200       | Threshold   | 77/77*   | 10-fold | 63   | 62/64     | C   | SVM | Linear kernel   | VVVV | [116] |
| Power150    | Graph based | 42/37*   | LOOCV   | 60.7 | -         | B   | SVM | Gaussian kernel | ?XXV | [117] |
| Whole brain | t test      | 447/517* | LOOCV   | 60   | 62/58     | B+C | LR  | Simple LR       | XXVV | [118] |

### ROI-based functional connectivity + Clinical data

|             |      |          |         |      |           |     |          |      |      |       |
|-------------|------|----------|---------|------|-----------|-----|----------|------|------|-------|
| Multi atlas | None | 408/401* | 10-fold | 73.2 | 74.5/71.7 | B+C | DNN      | DANN | XXVV | [119] |
| HO110       | None | 200/200* | 80:20   | 65   | 65/65     | B   | Ensemble | CRF  | VVVV | [120] |

### Graph metrics

|             |                  |          |          |      |           |     |          |                  |      |       |
|-------------|------------------|----------|----------|------|-----------|-----|----------|------------------|------|-------|
| AAL116      | GERSMC           | 103/106* | 70:30    | 96.8 | -         | B   | SVM      | RBF kernel       | VVVV | [121] |
| AAL116      | LLFS             | 45/39*   | 70:30    | 96.2 | -         | B   | SVM      | RBF kernel       | VXVV | [122] |
| AAL90       | LLFS             | 50/42*   | 80:20    | 95   | -         | B   | Ensemble | -                | VXVV | [123] |
| AAL116      | SSFA             | 28/19*   | 10-fold  | 95   | 97/91     | -   | SVM      | Gaussian kernel  | VXVV | [124] |
| DOS160      | Graph based      | 12/12    | LOOCV    | 91   | -         | C   | SVM      | Linear kernel    | VVVV | [125] |
| 6 RSN       | ICA-Graph based  | 103/192* | LOOCV    | 88.7 | 77.4/100  | B+C | SVM      | RBF kernel       | VXXV | [126] |
| AAL116      | Graph based      | 45/47    | 10-fold  | 87.7 | 87.8/87.7 | B   | SVM      | Linear kernel    | XXXV | [127] |
| AAL116      | Prim algorithm   | 59/46*   | 5-fold   | 86.7 | 87.5/85.7 | B+C | SVM      | RBF kernel       | VXXV | [128] |
| Power150    | LLFS             | 73/88*   | 5-fold   | 81.2 | -         | B   | FCNN     | -                | VV?V | [129] |
| HO110       | Graph based      | 403/468* | 10-fold  | 79.9 | -         | B+C | Ensemble | -                | VVVV | [130] |
| HO110       | None             | 403/468* | 10-fold  | 79.5 | 78.3/81.2 | B+C | GNN      | GFT + FCNN       | VVVV | [131] |
| Power150    | Threshold-RFE    | 403/468* | 10-fold  | 77.7 | -         | B+C | LDA      | -                | VVVV | [132] |
| HO110       | LLFS             | 416/451* | 80:20    | 76.3 | 81/71.3   | B+C | GNN      | ID + FCNN        | VVVV | [133] |
| Multi atlas | RFE              | 419/530* | 10-fold  | 75.9 | 79.2/71.5 | B+C | GNN      | MT + Ensemble    | VVVV | [134] |
| AAL116      | Threshold-RFE    | 119/116* | LOOCV    | 74.9 | 71.2/78   | B+C | LDA      | -                | VXVV | [135] |
| HO110       | None             | 221/253* | LOOCV    | 73.5 | 78.7/71.5 | B+C | GNN      | LR-GCN + FCNN    | VXVV | [136] |
| Whole brain | Graph based      | 403/468* | 10-fold  | 73.1 | 76/69     | B+C | Ensemble | -                | VVVV | [137] |
| HO110       | RFE              | 539/573* | 10-fold  | 73   | 68.8/76.9 | B+C | GNN      | GFT + FCNN       | VVVV | [138] |
| HO110       | t test-LASSO     | 403/468* | 10-fold  | 72.4 | 71.2/75   | B+C | DNN      | GAT              | VVVV | [139] |
| HO110       | RFE-PCA-AE       | 403/468* | 10-fold  | 70.4 | -         | B+C | GNN      | GFT + FCNN       | VVVV | [140] |
| Power150    | Graph based      | 42/37    | 5-fold   | 69.8 | -         | B   | Ensemble | RF               | VXXV | [141] |
| HO110       | None             | 403/468* | 10-fold  | 69.5 | -         | B+C | GNN      | GFT + FCNN       | VVVV | [142] |
| AAL90       | EW               | 474/539* | 5-fold   | 68.7 | 69.2/68.3 | B+C | CNN      | Self-proposed    | VVVV | [143] |
| Multi atlas | None             | 485/544* | 60:10:30 | 67.3 | 70.4/64.2 | B+C | GNN      | MT + KNN         | VVVV | [144] |
| AAL116      | None             | 402/464* | 10-fold  | 67.2 | 65.9/68.4 | B+C | GNN      | hi-GCN + RBF-SVM | VVVV | [145] |
| Whole brain | Graph based-LLFS | 42/37*   | LOOCV    | 67   | 70/63.9   | B   | Ensemble | -                | ?VXV | [146] |
| AAL116      | Graph based      | 29/31*   | External | 65.5 | -         | C   | SVM      | Linear kernel    | VV?V | [147] |
| Power150    | Graph based      | 42/37*   | LOOCV    | 63.3 | 73.8/51.4 | -   | SVM      | Grass kernel     | ?XXV | [148] |

|       |             |          |         |      |           |     |      |              |      |       |
|-------|-------------|----------|---------|------|-----------|-----|------|--------------|------|-------|
| HO110 | None        | 403/468* | 5-fold  | 62.9 | -         | B+C | GNN  | s-GCN + FCNN | ×✓✓✓ | [149] |
| CC200 | Graph based | 493/530* | 17-fold | 59.2 | 61.4/57.4 | B+C | FCNN | -            | ×✓✓✓ | [150] |

### Graph metrics + Clinical data

|             |             |          |        |      |           |     |     |               |      |       |
|-------------|-------------|----------|--------|------|-----------|-----|-----|---------------|------|-------|
| BNA246      | Graph based | 270/305* | 5-fold | 74.5 | 63.5/84.3 | B+C | CNN | Self-proposed | ×✓✓✓ | [151] |
| Multi atlas | None        | 539/573* | 90:10  | 70.2 | -         | B+C | GNN | GFT + FCNN    | ×✓✓✓ | [152] |

### Dynamic functional connectivity

|               |               |          |          |      |           |     |              |                   |      |       |
|---------------|---------------|----------|----------|------|-----------|-----|--------------|-------------------|------|-------|
| AAL116        | HMM           | 47/73*   | 10-fold  | 90.1 | 85.5/93.2 | B   | SVM          | Linear kernel     | ×✓×✓ | [153] |
| Multi-network | Self-proposed | 30/30*   | LOOCV    | 90   | 87/93     | B   | SVM          | Multi kernel      | ?✓✓✓ | [154] |
| Whole brain   | None          | 42/42*   | 28-fold  | 89.3 | 88.1/83.3 | B   | AE + Softmax | SAE               | ×××✓ | [155] |
| TFP-IP        | SSFA          | 48/51*   | 5-fold   | 88   | 87/88     | B   | KNN          | -                 | ×✓×✓ | [156] |
| AAL116        | WT            | 41/41*   | 70:15:15 | 85.9 | 79.3/92.6 | -   | KNN          | -                 | ?×?✓ | [157] |
| AAL116        | t test-LASSO  | 45/47*   | 6-fold   | 83   | 82/84     | B   | SVM          | Linear kernel     | ✓✓×✓ | [158] |
| AAL116        | PCA           | 49/41*   | LOOCV    | 78.9 | 85.7/70.7 | B+C | SVM          | Linear kernel     | ✓✓✓✓ | [159] |
| AAL116        | MTFS-EM       | 403/468* | 10-fold  | 76.8 | 72.5/79.9 | B+C | SVM          | Multi kernel      | ×✓✓✓ | [160] |
| CC200         | RFE           | 399/472* | 10-fold  | 76.6 | 78.6/74.3 | B+C | SVM          | Linear kernel     | ×✓✓✓ | [161] |
| AAL116        | HMM           | 121/171* | 10-fold  | 75.9 | 83.3/70.6 | B   | SVM          | Linear kernel     | ×✓✓✓ | [162] |
| CC200         | HMM           | 145/157* | 10-fold  | 74.9 | -         | B+C | SVM          | Linear kernel     | ✓✓✓✓ | [163] |
| BASC64        | MSTEPS        | 403/468* | 10-fold  | 74.7 | 73/76.3   | B+C | LSTM         | -                 | ×✓✓✓ | [164] |
| CC200         | AE            | 322/352* | LOOCV    | 74.7 | 73/75     | B+C | LSTM         | -                 | ×✓×✓ | [165] |
| AAL116        | LLFS          | 423/446* | 10-fold  | 73.6 | 75/72     | B+C | Ensemble     | -                 | ×✓?✓ | [166] |
| AAL116        | LLFS-LASSO    | 45/47*   | 10-fold  | 71.4 | 60.5/81.6 | B   | SVM          | RBF kernel        | ✓✓×✓ | [167] |
| Whole brain   | WT            | 210/249* | 10-fold  | 70.5 | 67.9/74.2 | B   | CNN          | Self-proposed     | ××✓✓ | [168] |
| HO110         | LLFS          | 539/573* | 80:20    | 69.8 | 77.1/60.6 | B+C | SVM          | Polynomial kernel | ×✓✓✓ | [169] |
| CC200         | None          | 539/573* | 10-fold  | 68.5 | -         | B+C | LSTM         | -                 | ×✓✓✓ | [170] |
| CC200         | Manual        | 147/146* | 5-fold   | 61.1 | 61.8/60   | B+C | SVM          | Linear kernel     | ?✓?✓ | [171] |
| AAL116        | BS            | 25/25    | External | 53   | 50/55     | B   | LSTM         | -                 | ×✓✓✓ | [172] |
| Multi atlas   | ICA-PCA-LLFS  | 32/34    | LOOCV    | 50   | -         | C   | LDA          | -                 | ✓✓✓✓ | [173] |

### Effective connectivity

|        |               |          |       |    |           |     |     |            |      |       |
|--------|---------------|----------|-------|----|-----------|-----|-----|------------|------|-------|
| AAL116 | t test        | 48/30*   | LOOCV | 87 | 80/92     | B+C | SVM | RBF kernel | ×✓✓✓ | [174] |
| HO110  | DR-ICA-t test | 127/135* | LOOCV | 69 | 63.5/74.6 | B+C | LDA | -          | ×✓×✓ | [175] |

### 3D fMRI

|             |      |         |       |      |           |     |     |               |      |       |
|-------------|------|---------|-------|------|-----------|-----|-----|---------------|------|-------|
| Whole brain | None | 79/105* | -     | 94.7 | 92.5/96.2 | B+C | CNN | DarkNet-19    | ×✓?✓ | [176] |
| Whole brain | BOF  | 19/19*  | 70:30 | 81   | 79/83     | B   | SVM | Linear kernel | ?✓✓✓ | [177] |

### Power spectral density

|             |      |         |       |      |         |   |              |     |      |       |
|-------------|------|---------|-------|------|---------|---|--------------|-----|------|-------|
| Whole brain | None | 117/81* | LOOCV | 96.2 | 98/93.6 | B | AE + Softmax | SAE | ×✓×✓ | [178] |
|-------------|------|---------|-------|------|---------|---|--------------|-----|------|-------|

|                                                                            |               |            |          |      |           |     |          |                   |      |       |
|----------------------------------------------------------------------------|---------------|------------|----------|------|-----------|-----|----------|-------------------|------|-------|
| Whole brain                                                                | AE            | 123/160*** | LOOCV    | 92   | 93/89     | B   | SVM      | RBF kernel        | ✓XX✓ | [179] |
| Regional homogeneity                                                       |               |            |          |      |           |     |          |                   |      |       |
| AAL116                                                                     | Chi square    | 443/435*   | 75:25    | 68.9 | -         | B+C | DNN      | PBL-McRBFN        | XX✓✓ | [180] |
| Whole brain                                                                | Self-proposed | 539/573*   | 5-fold   | 62   | -         | B+C | SVM      | Linear kernel     | XX✓✓ | [181] |
| High-order functional connectivity                                         |               |            |          |      |           |     |          |                   |      |       |
| AAL116                                                                     | LASSO         | 54/46*     | 10-fold  | 81   | 82/80     | B   | SVM      | Linear kernel     | ✓✓X✓ | [182] |
| CC200                                                                      | LLFS          | 511/561*   | 10-fold  | 77.3 | 78/77.8   | B+C | DNN      | PTN               | XX✓✓ | [183] |
| AAL116                                                                     | t test        | 77/105     | 10-fold  | 72.6 | 79/64     | B+C | Ensemble | Sparce-MVTC       | XX✓✓ | [184] |
| AAL116                                                                     | t test        | 134/160*   | 10-fold  | 68.8 | 73.6/62.5 | B+C | Ensemble | Sparce-MVTC       | XX✓✓ | [185] |
| Wavelet-based dynamics features                                            |               |            |          |      |           |     |          |                   |      |       |
| HO110                                                                      | GARCH-t test  | 222/246*   | 5-fold   | 75.3 | -         | -   | SVM      | Linear kernel     | ?X✓✓ | [186] |
| 7 RSN                                                                      | ICA-DR        | 24/30      | LOOCV    | 86.7 | 91.7/83.3 | B   | SVM      | Polynomial kernel | ?✓✓✓ | [187] |
| Independent components                                                     |               |            |          |      |           |     |          |                   |      |       |
| Whole brain                                                                | ICA           | 392/407*   | -        | 89.5 | 89.3/89.7 | B+C | Ensemble | -                 | X✓?✓ | [188] |
| Whole brain                                                                | ICA-DR        | 20/20***   | LOOCV    | 83   | 67/100    | B   | LR       | Simple LR         | ✓✓✓✓ | [189] |
| 8 RSN                                                                      | LLFS          | 79/105*    | 10-fold  | 77.7 | 78.6/76.9 | B+C | CNN      | Standard          | XX✓✓ | [190] |
| Histogram of oriented gradients + Characteristics                          |               |            |          |      |           |     |          |                   |      |       |
| HO110                                                                      | MRMR          | 538/573*   | 80:20    | 65   | 71.3/58.3 | B+C | SVM      | RBF kernel        | XX✓✓ | [191] |
| ROI-based functional connectivity + Normalized image                       |               |            |          |      |           |     |          |                   |      |       |
| Multi atlas                                                                | None          | 542/625*   | 77:33    | 71.7 | -         | B+C | CNN      | 3D CNN            | XX✓✓ | [192] |
| ROI-based functional connectivity + Clinical data + Information theory     |               |            |          |      |           |     |          |                   |      |       |
| CC200                                                                      | RFE           | 399/472*   | 10-fold  | 72.5 | 79.2/64.7 | B+C | SVM      | Linear kernel     | XX✓✓ | [193] |
| ROI-based functional connectivity + Amplitude of low-frequency fluctuation |               |            |          |      |           |     |          |                   |      |       |
| AAL90                                                                      | None          | 99/85*     | 10-fold  | 68.5 | 69.5/67.6 | B+C | CNN      | Standard          | XX✓✓ | [194] |
| Topology                                                                   |               |            |          |      |           |     |          |                   |      |       |
| CC200                                                                      | None          | 505/530*   | 5-fold   | 69.2 | -         | B+C | FCNN     | -                 | XX✓✓ | [195] |
| Non-oscillatory connectivity                                               |               |            |          |      |           |     |          |                   |      |       |
| AAL116                                                                     | t test        | 36/36*     | 10-fold  | 80   | 80/80     | B+C | SVM      | Polynomial kernel | XXX✓ | [196] |
| Combined features                                                          |               |            |          |      |           |     |          |                   |      |       |
| 9 measures                                                                 | None          | 620/542*   | 5-fold   | 64   | -         | B+C | SVM      | Linear kernel     | XX✓✓ | [197] |
| Normalized image                                                           |               |            |          |      |           |     |          |                   |      |       |
| EPI images                                                                 | None          | 69/69*     | 70:15:15 | 98.4 | -         | B   | CNN      | Inception V3      | ✓X✓✓ | [198] |
| Glass brain-Stat_map                                                       | LLFS          | 529/573*   | 85:15    | 82.7 | -         | B+C | Ensemble | -                 | XX✓✓ | [199] |

| EPI images                                                                                   | None     | 74/98*     | 70:15:15   | 57.8     | 57.2/61.3 | B+C | CNN                     | InceptionResNet V2   | ×✓✓✓         | [200]     |
|----------------------------------------------------------------------------------------------|----------|------------|------------|----------|-----------|-----|-------------------------|----------------------|--------------|-----------|
| DWI/DTI                                                                                      |          |            |            |          |           |     |                         |                      |              |           |
| Feature Selection <sup>2</sup>                                                               |          | ASD/TD     | Validation | Accuracy | Sen/Spe   | Age | Classifier <sup>3</sup> | AI Spec <sup>4</sup> | Risk of bias | Reference |
| Fractional anisotropy                                                                        |          |            |            |          |           |     |                         |                      |              |           |
| PCA                                                                                          |          | 41/32      | LOOCV      | 75.3     | 71.9/71.9 | -   | SVM                     | Linear kernel        | ?✓×?         | [201]     |
| Fiber density + Fiber bundle cross-section                                                   |          |            |            |          |           |     |                         |                      |              |           |
| t test-LASSO-RFE                                                                             |          | 26/26***   | 10-fold    | 73.1     | 71.1/75.1 | C   | SVM                     | Linear kernel        | ✓✓×✓         | [202]     |
| Fractional anisotropy + Mean diffusivity                                                     |          |            |            |          |           |     |                         |                      |              |           |
| S2n                                                                                          |          | 70/80      | LOOCV      | 81.3     | -         | B   | SVM                     | Polynomial kernel    | ✓✓×?         | [203]     |
| S2n                                                                                          |          | 45/30      | LOOCV      | 80       | 74/84     | B   | SVM                     | RBF kernel           | ×✓×✓         | [204]     |
| S2n                                                                                          |          | 70/79      | 10-fold    | 78.3     | 84.8/72.9 | B   | SVM                     | Polynomial kernel    | ✓✓✓✓         | [205]     |
| Fractional anisotropy + Axial diffusivity + Radial diffusivity + Spherical harmonics         |          |            |            |          |           |     |                         |                      |              |           |
| t test                                                                                       |          | 19/19      | LOOCV      | 86.8     | -         | A   | Ensemble                | RF                   | ✓✓✓?         | [206]     |
| Fractional anisotropy + Mean diffusivity + Axial diffusivity + Radial diffusivity + Skewness |          |            |            |          |           |     |                         |                      |              |           |
| RFE                                                                                          |          | 125/100*   | 5-fold     | 99       | -         | B+C | SVM                     | Linear kernel        | ×✓✓✓         | [207]     |
| None                                                                                         |          | 30/30      | 70:30      | 94.7     | 91.7/100  | B+C | QDA                     | -                    | ✓✓✓✓         | [208]     |
| S2n                                                                                          |          | 124/139*** | LOOCV      | 73       | 70/76     | B   | SVM                     | Linear kernel        | ×✓×✓         | [209]     |
| Graph metrics                                                                                |          |            |            |          |           |     |                         |                      |              |           |
| Graph based-LLFS                                                                             |          | 43/51*     | LOOCV      | 68       | 70/65.3   | B   | Ensemble                | -                    | ?✓×✓         | [146]     |
| Graph based                                                                                  |          | 42/37*     | LOOCV      | 68       | -         | B   | SVM                     | Gaussian kernel      | ?××✓         | [117]     |
| EEG                                                                                          |          |            |            |          |           |     |                         |                      |              |           |
| Feature Selection <sup>2</sup>                                                               | Channels | ASD/TD     | Validation | Accuracy | Sen/Spe   | Age | Classifier <sup>3</sup> | AI Spec <sup>4</sup> | Risk of Bias | Reference |
| Entropy + Spatiotemporal features                                                            |          |            |            |          |           |     |                         |                      |              |           |
| MI                                                                                           | 128      | 48/48      | 10-fold    | 95.7     | -         | B   | SVM                     | Gaussian kernel      | ✓✓✓?         | [210]     |
| LLFS                                                                                         | 18       | 15/10      | LOOCV      | 92.8     | -         | B   | Ensemble                | RF                   | ×✓✓✓         | [211]     |
| Frequency-domain + Spatiotemporal features                                                   |          |            |            |          |           |     |                         |                      |              |           |
| Manual                                                                                       | 19       | 9/9        | 78:22      | 95.5     | -         | B   | PNN                     | -                    | ?✓✓✓         | [212]     |
| Manual                                                                                       | 19       | 10/9       | -          | 89.5     | -         | B   | KNN                     | -                    | ×✓?✓         | [213]     |
| Complex networks                                                                             |          |            |            |          |           |     |                         |                      |              |           |
| Graph based                                                                                  | 128      | 12/12      | LOOCV      | 94.7     | 85.7/100  | B   | SVM                     | Polynomial kernel    | ?✓✓×         | [214]     |
| MI                                                                                           | 21       | 28/28      | 10-fold    | 92.3     | -         | B   | SVM                     | Gaussian kernel      | ✓✓×✓         | [215]     |
| PCA                                                                                          | 24       | 430/554    | 50:50      | 86       | -         | B   | DFA                     | -                    | ✓✓✓✓         | [216]     |

|                                                                |     |         |         |      |           |     |           |                   |      |       |
|----------------------------------------------------------------|-----|---------|---------|------|-----------|-----|-----------|-------------------|------|-------|
| Graph based                                                    | 10  | 30/30   | LOOCV   | 81.7 | 83.3/80   | B   | KNN       | -                 | X?XX | [217] |
| Entropy + Frequency-domain + Time-domain + Non-linear features |     |         |         |      |           |     |           |                   |      |       |
| None                                                           | -   | 48/50   | 50:50   | 97.9 | 96/95.8   | B   | PSN-ANFIS | -                 | ??√X | [218] |
| MI                                                             | 10  | 34/11   | 70:30   | 94.7 | 99.1/-    | B   | SVM       | Linear kernel     | XX√√ | [219] |
| Entropy + Non-linear features                                  |     |         |         |      |           |     |           |                   |      |       |
| RFE                                                            | 19  | 18/23   | 10-fold | 97   | 100/94    | B   | SVM       | Linear kernel     | X√X√ | [220] |
| PCA                                                            | 17  | 7/7     | LOOCV   | 92.9 | 100/85.7  | B   | SVM       | RBF kernel        | X√√√ | [221] |
| None                                                           | 19  | 20/20   | 75:25   | 91.9 | -         | B   | RNN       | -                 | ?√√√ | [222] |
| RFE                                                            | 19  | 21/102  | LOOCV   | 90.2 | 95/89     | A   | SVM       | RBF kernel        | √√X√ | [223] |
| Entropy + Frequency-domain + Non-linear features               |     |         |         |      |           |     |           |                   |      |       |
| None                                                           | 64  | 9/10    | 10-fold | 84.5 | -         | B   | KNN       | -                 | X√X? | [224] |
| Time-domain features                                           |     |         |         |      |           |     |           |                   |      |       |
| Manual                                                         | 40  | 10/10   | 3-fold  | 98.6 | -         | C   | SVM       | Linear kernel     | √√X√ | [225] |
| Event-related potentials                                       |     |         |         |      |           |     |           |                   |      |       |
| ICA                                                            | 19  | 41/32   | -       | 90.4 | 90.4/89.8 | B   | SVM       | Linear kernel     | √√?? | [226] |
| Manual                                                         | 128 | 19/30   | LOOCV   | 79   | 68/87     | B   | NB        | -                 | X√√√ | [227] |
| GA                                                             | 128 | 19/112  | 70:30   | 70   | 40/100    | A   | SVM       | Linear kernel     | X√√√ | [228] |
| Entropy + Frequency-domain features                            |     |         |         |      |           |     |           |                   |      |       |
| Manual                                                         | 14  | 89/94   | 10-fold | 99.7 | 99.9/95.9 | B   | SVM       | Polynomial kernel | √√√√ | [229] |
| None                                                           | 16  | 8/4     | 10-fold | 99.7 | -         | B   | FCNN      | -                 | X√X? | [230] |
| t test                                                         | 64  | 40/37   | 10-fold | 98.7 | 100/97.3  | B   | PNN       | -                 | √√√√ | [231] |
| LLFS                                                           | 19  | 10/18   | LOOCV   | 96   | 90/100    | -   | SVM       | RBF kernel        | ?√√X | [232] |
| Manual                                                         | 23  | 9/10    | 10-fold | 91.2 | -         | B   | FCNN      | -                 | X√X? | [233] |
| -                                                              | 128 | 25/25   | -       | 87   | -         | B   | SVM       | Linear kernel     | ?√?√ | [234] |
| Manual                                                         | 16  | 100/100 | 10-fold | 86   | 85.9/89.7 | B   | SVM       | Polynomial kernel | √√√√ | [235] |
| Frequency-domain features                                      |     |         |         |      |           |     |           |                   |      |       |
| None                                                           | 32  | 8/9     | 10-fold | 98.3 | 98/98     | B   | Ensemble  | RF                | X√X√ | [236] |
| LLFS                                                           | 64  | 61/61   | 10-fold | 96.4 | 97.8/93.2 | B   | SVM       | Polynomial kernel | √√√√ | [237] |
| Manual                                                         | 19  | 15/11   | -       | 96.2 | -         | B   | KNN       | -                 | √??√ | [238] |
| PCA                                                            | 16  | 12/4    | 10-fold | 95.2 | 97.1/90.9 | B+C | SVM       | Linear kernel     | X√X? | [239] |
| PCA                                                            | 64  | 60/60   | -       | 94.4 | 100/88.9  | B   | FCNN      | -                 | ?√?? | [240] |
| Manual                                                         | 32  | 10/5    | k-fold  | 93.3 | -         | B   | Ensemble  | RF                | ?XX√ | [241] |
| LLFS                                                           | 16  | 8/4     | 10-fold | 90   | -         | B   | FLDA      | -                 | X√X? | [242] |
| PCA                                                            | 8   | 6/6     | -       | 90   | -         | B   | FCNN      | -                 | ?√?X | [243] |

|        |     |       |          |      |        |     |      |           |      |       |
|--------|-----|-------|----------|------|--------|-----|------|-----------|------|-------|
| LLFS   | -   | 8/10  | 18-fold  | 88.9 | 88.9   | B   | FLDA | -         | ??XX | [244] |
| Manual | 8   | 6/6   | 5-fold   | 86.6 | -      | -   | FCNN | -         | ??XX | [245] |
| Manual | 128 | 36/69 | 5-fold   | 85.2 | -      | B+C | PTN  | -         | ?X√√ | [246] |
| None   | 22  | 10/10 | 5-fold   | 81.9 | 91/100 | -   | CNN  | ResNet-50 | ?√XX | [247] |
| Manual | 19  | 11/10 | -        | 81   | -      | B   | KNN  | -         | X√?√ | [248] |
| None   | 16  | 13/4  | 70:15:15 | 80.9 | -      | -   | FCNN | -         | ?√√X | [249] |

### Frequency-domain + Time-domain features

|      |    |       |         |      |   |   |     |               |      |       |
|------|----|-------|---------|------|---|---|-----|---------------|------|-------|
| None | 8  | 46/63 | 10-fold | 92.7 | - | B | SVM | Linear kernel | √√√√ | [250] |
| None | 16 | 8/18  | 10-fold | 80   | - | B | CNN | Standard      | ?√XX | [251] |

### Non-linear features

|    |    |       |        |      |           |   |      |            |      |       |
|----|----|-------|--------|------|-----------|---|------|------------|------|-------|
| -  | 32 | 8/9   | 5-fold | 85.5 | -         | B | FCNN | -          | ?XXX | [252] |
| MI | 2  | 34/27 | 5-fold | 82   | 94.1/66.7 | B | SVM  | RBF kernel | ?X√X | [253] |

### Raw data

|      |    |      |          |      |   |   |          |               |      |       |
|------|----|------|----------|------|---|---|----------|---------------|------|-------|
| ICA  | 16 | 9/10 | 10-fold  | 99.5 | - | B | Ensemble | RNN-GRU + CNN | ?√X? | [254] |
| None | 16 | 8/12 | 80:10:10 | 80   | - | B | CNN      | Standard      | ?√√? | [255] |

### Frequency-domain + Non-linear features

|        |    |       |       |      |       |   |      |     |      |       |
|--------|----|-------|-------|------|-------|---|------|-----|------|-------|
| t test | 19 | 9/8   | 80:20 | 90   | -     | B | FCNN | RBF | √√√X | [256] |
| t test | 19 | 17/11 | -     | 78.5 | 80/71 | B | KNN  | -   | X√?√ | [257] |

## Eye Tracking

| Feature Selection <sup>2</sup> | ASD/TD | Validation | Accuracy | Sen/Spe   | Age | Classifier <sup>3</sup> | AI Spec <sup>4</sup> | Risk of bias | Reference |
|--------------------------------|--------|------------|----------|-----------|-----|-------------------------|----------------------|--------------|-----------|
| Interactions with parents      |        |            |          |           |     |                         |                      |              |           |
| Manual                         | 6/26   | LOOCV      | 93.8     | 100/92.3  | A   | VMM                     | -                    | ?-√?         | [258]     |
| Watching videos                |        |            |          |           |     |                         |                      |              |           |
| LLFS                           | 61/72  | 10-fold    | 87.5     | 87.5/87.5 | B   | SVM                     | Linear kernel        | X-√√         | [259]     |
| Manual                         | 17/15  | 75:25      | 83.4     | 100/66.6  | B   | LSTM                    | -                    | ?-√?         | [260]     |
| PCA                            | 29/30  | 10-fold    | AUC 92   | -         | A   | FCNN                    | -                    | ?-X√         | [261]     |
| GA                             | 76/30  | 5-fold     | AUC 82   | 69/93     | B   | FCNN                    | -                    | ?-√√         | [262]     |
| Watching websites              |        |            |          |           |     |                         |                      |              |           |
| t test-RFE                     | 15/15  | 80:20      | 91.6     | 92.9/90   | C   | DT                      | -                    | √-√√         | [263]     |
| Manual                         | 15/15  | 70:30      | 70       | -         | C   | LR                      | Simple LR            | √-√√         | [264]     |
| Manual                         | 19/19  | 70:30      | 65       | -         | C   | LR                      | Simple LR            | X-√√         | [265]     |
| None                           | 15/15  | 66:33      | 60       | -         | C   | STA                     | -                    | √-√√         | [266]     |

### Observing images



|         |       |       |      |           |   |          |           |      |       |
|---------|-------|-------|------|-----------|---|----------|-----------|------|-------|
| F score | 20/19 | LOOCV | 92   | 93/92     | C | Ensemble | CNN + SVM | ✓-✓✓ | [267] |
| LLFS    | 14/14 | 75:25 | 59.3 | 68.4/50.6 | B | DT       | -         | ✓-✓✓ | [268] |

### Saliency maps

|        |       |          |      |           |   |          |               |      |       |
|--------|-------|----------|------|-----------|---|----------|---------------|------|-------|
| None   | 14/14 | LOOCV    | 99.8 | 100/99.7  | - | Ensemble | XGBoost       | ?-✓? | [269] |
| None   | 20/19 | LOOCV    | 99   | 100/98    | - | Ensemble | CNN + LSTM    | ?-✓? | [270] |
| Manual | 37/37 | 5-fold   | 85.1 | 86.5/83.8 | B | SVM      | Linear kernel | ✓-✓✓ | [271] |
| None   | 14/14 | 60:15:25 | 62.1 | 71/54     | B | CNN      | ResNet-50     | ?-✓? | [272] |

### Virtual reality

|      |       |        |    |         |   |          |               |      |       |
|------|-------|--------|----|---------|---|----------|---------------|------|-------|
| RFE  | 35/20 | 5-fold | 86 | 91/82   | B | SVM      | Linear kernel | ?-X✓ | [273] |
| LLFS | 55/52 | 3-fold | 73 | 81/65.8 | C | Ensemble | -             | ✓-✓? | [274] |

### Watching faces

|      |       |         |      |           |   |     |               |      |       |
|------|-------|---------|------|-----------|---|-----|---------------|------|-------|
| LLFS | 29/48 | LOOCV   | 88.5 | 93.1/86.2 | B | SVM | RBF kernel    | ?-XX | [275] |
| LLFS | 20/41 | LOOCV   | 86.9 | -         | B | SVM | RBF kernel    | ?-XX | [276] |
| MRMR | 77/80 | 10-fold | 84.2 | -         | B | SVM | Linear kernel | ✓-✓✓ | [277] |

### Face-to-face conversations

|     |       |       |      |          |   |     |               |      |       |
|-----|-------|-------|------|----------|---|-----|---------------|------|-------|
| FFS | 20/19 | LOOCV | 92.3 | 84.2/100 | B | SVM | Linear kernel | ✓-✓✓ | [278] |
|-----|-------|-------|------|----------|---|-----|---------------|------|-------|

## Facial Recognition

| Feature Selection <sup>2</sup> | ASD/TD* | Validation | Accuracy | Sen/Spe | Age | Classifier <sup>3</sup> | AI Spec <sup>4</sup> | Risk of bias | Reference |
|--------------------------------|---------|------------|----------|---------|-----|-------------------------|----------------------|--------------|-----------|
|--------------------------------|---------|------------|----------|---------|-----|-------------------------|----------------------|--------------|-----------|

### Static facial features

|      |             |         |      |           |   |     |                   |      |       |
|------|-------------|---------|------|-----------|---|-----|-------------------|------|-------|
| None | 556/556     | 80:20   | 95   | 95/95     | B | CNN | VGG-16 + TL       | XX✓? | [279] |
| None | 1507/1507** | 90:10   | 94.6 | -         | B | CNN | MobileNet-V1      | XX✓X | [280] |
| None | 1269/1269** | 92:8    | 91.5 | 93.4/89.7 | B | CNN | DenseNet          | XX✓X | [281] |
| None | 1468/1468** | 80:20   | 91   | -         | B | CNN | VGG-16 + TL       | XX✓X | [282] |
| None | 1468/1468** | 70:30   | 91   | -         | B | CNN | VGG-16 + TL       | XX✓X | [283] |
| None | 1468/1468** | 87:3:10 | 90.7 | 90.7/90.7 | B | CNN | MobileNet-V1 + TL | XX✓X | [284] |
| None | 1468/1468** | 86:4:10 | 90   | 88.5/91.7 | B | CNN | Xception + TL     | XX✓X | [285] |
| None | 1426/1374** | 86:7:7  | 87   | -         | B | CNN | MobileNet-V1      | X✓✓X | [286] |
| None | 1568/1568** | 81:16:3 | 87   | 87/87     | B | CNN | MobileNet-V1 + TL | XX✓X | [287] |

### Facial attribute recognition

|        |       |       |      |       |   |     |                 |      |       |
|--------|-------|-------|------|-------|---|-----|-----------------|------|-------|
| Manual | 20/26 | LOOCV | 80.8 | -     | B | CNN | -               | X✓✓✓ | [288] |
| Manual | 49/39 | LOOCV | 72.9 | 76/69 | - | CNN | BottleNeck + TL | XX✓X | [289] |

## S-MRI

| Feature Selection <sup>2</sup> | ASD/TD | Validation | Accuracy | Sen/Spe | Age | Classifier <sup>3</sup> | AI Spec <sup>4</sup> | Risk of bias | Reference |
|--------------------------------|--------|------------|----------|---------|-----|-------------------------|----------------------|--------------|-----------|
|--------------------------------|--------|------------|----------|---------|-----|-------------------------|----------------------|--------------|-----------|

### Volume-based morphological features

|         |            |          |        |           |     |              |                  |      |       |
|---------|------------|----------|--------|-----------|-----|--------------|------------------|------|-------|
| Manual  | 24/24*     | LOOCV    | 98     | -         | B+C | Ensemble     | RF               | ??✓✓ | [290] |
| None    | 74/208     | 10-fold  | 92     | 87/93     | A   | Ensemble     | CNN + SFCNN      | ✓✓✓✓ | [291] |
| VBM     | 24/24      | 10-fold  | 92     | -         | B   | SVM          | RBF kernel       | ✓✓X✓ | [292] |
| F score | 78/104*    | 10-fold  | 90.4   | 84.4/95.9 | B+C | AE + Softmax | Stacked SAE      | X✓✓✓ | [293] |
| VBM     | 60/60      | LOOCV    | 86.7   | 86.4/86.8 | C   | SVM          | Linear kernel    | ✓✓X✓ | [294] |
| VBM     | 36/36      | LOOCV    | 81     | 81/81     | C   | LDA          | PLS              | ✓✓X✓ | [295] |
| Manual  | 52/40      | 10-fold  | 77.2   | -         | B   | SVM          | Linear kernel    | X?✓✓ | [296] |
| RFE     | 22/22      | LOOCV    | 77     | 77/77     | C   | SVM          | Linear kernel    | ✓✓✓✓ | [297] |
| LASSO   | 54/57*     | 10-fold  | 75.4   | 74.6/76   | B   | SVM          | Linear kernel    | X✓✓✓ | [298] |
| Manual  | 120/136*   | 80:20    | 73     | 92/68     | C   | SVM          | Linear kernel    | ?✓✓✓ | [299] |
| VBM     | 79/105*    | 75:25    | 70     | 53/72     | B+C | DNN          | PBL-McRBFN       | ?✓✓✓ | [300] |
| None    | 1555/12623 | 66:17:17 | 66.4   | -         | All | CNN          | Ensemble         | X✓✓✓ | [301] |
| None    | 1060/1166* | 5-fold   | 63.8   | -         | B+C | CNN          | Fed-3D-Resnet-18 | X?✓✓ | [302] |
| VBM     | 449/451*   | 75:25    | 59.6   | -         | B+C | DNN          | PBL-McRBFN       | X✓✓✓ | [303] |
| VBM-RFE | 38/38      | LOOCV    | AUC 80 | -         | B   | SVM          | Linear kernel    | ✓✓✓✓ | [304] |

### Surface-based morphological features

|          |          |         |    |           |     |          |               |      |       |
|----------|----------|---------|----|-----------|-----|----------|---------------|------|-------|
| LASSO-DL | 364/361* | 10-fold | 83 | 80/85     | B+C | Ensemble | -             | ✓✓✓✓ | [305] |
| RFE      | 100/100* | 60:40   | 80 | 72.5/67.5 | B+C | Ensemble | -             | ?✓✓✓ | [306] |
| LLFS-PCA | 50/150*  | 5-fold  | 75 | 98.6/40   | C   | SVM      | Linear kernel | ✓✓✓✓ | [307] |

### Cortical thickness

|      |          |         |      |         |     |      |               |      |       |
|------|----------|---------|------|---------|-----|------|---------------|------|-------|
| RFE  | 20/20    | LOOCV   | 90   | 90/90   | C   | SVM  | Linear kernel | X✓✓✓ | [308] |
| None | 22/16    | 10-fold | 87   | 95/75   | B   | LMT  | -             | ✓✓X✓ | [309] |
| RFE  | 40/36    | LOOCV   | 84.2 | 80/88.9 | B   | SVM  | RBF kernel    | X?X✓ | [310] |
| MRMR | 325/325* | 5-fold  | 62   | -       | B+C | FCNN | -             | X✓✓✓ | [311] |

### Normalized image

|      |           |          |      |       |     |          |             |      |       |
|------|-----------|----------|------|-------|-----|----------|-------------|------|-------|
| None | 112/102*  | 5-fold   | 99   | 99/99 | C   | Ensemble | CNN + SFCNN | ✓✓✓✓ | [312] |
| None | 521/573*  | -        | 87   | -     | -   | CNN      | ResNet-50   | XX?✓ | [313] |
| DSM  | 171/176   | 65:22:13 | 84.4 | 85/84 | A   | CNN      | CSResNet-18 | ✓✓✓✓ | [314] |
| GA   | 500/500*  | 5-fold   | 73   | -     | B   | CNN      | 3D CNN      | X✓✓✓ | [315] |
| None | 500*      | -        | 71   | 66/69 | B+C | CNN      | 3D-ResNet   | ?X?✓ | [316] |
| None | 946/1046* | 80:20    | 64   | -     | B+C | CNN      | 3D CNN      | X✓✓✓ | [317] |

### Volume-based morphological features + Cortical thickness

|                 |          |        |      |       |     |     |              |      |       |
|-----------------|----------|--------|------|-------|-----|-----|--------------|------|-------|
| t test-MRMR-RFE | 58/59*** | 2-fold | 96.3 | 95/97 | B   | SVM | Multi kernel | ?✓✓✓ | [318] |
| None            | 245/245* | 90:10  | 60   | -     | B+C | LDA | -            | ✓✓✓✓ | [319] |

|                                                                                                 |            |         |        |           |     |              |               |      |       |
|-------------------------------------------------------------------------------------------------|------------|---------|--------|-----------|-----|--------------|---------------|------|-------|
| None                                                                                            | 83/105     | 70:30   | AUC 64 | -         | C   | AE + Softmax | Denoising AE  | ✓✓✓✓ | [320] |
| Surface-based morphological features + Cortical thickness                                       |            |         |        |           |     |              |               |      |       |
| Elastic net-LASSO                                                                               | 100/100*   | 66:33   | 96.3   | 95.5/97   | B   | RR           | -             | ✓✓✓✓ | [321] |
| None                                                                                            | 361/373*   | LOOCV   | 60     | 57/64     | B+C | Ensemble     | RF            | ×?×✓ | [322] |
| Surface-based morphological features + Clinical data                                            |            |         |        |           |     |              |               |      |       |
| Manual                                                                                          | 26/24*     | 70:30   | 88     | 80/92.9   | -   | Ensemble     | RF            | ?✓✓✓ | [323] |
| Surface-based morphological features + Volume-based morphological features                      |            |         |        |           |     |              |               |      |       |
| RFE                                                                                             | 209/530*   | 85:15   | 80     | -         | B+C | FCNN         | -             | ×✓✓✓ | [324] |
| Manual                                                                                          | 539/573*   | LOOCV   | 56.3   | -         | B+C | FCNN         | -             | ×✓×✓ | [325] |
| Surface-based morphological features + Volume-based morphological features + Cortical thickness |            |         |        |           |     |              |               |      |       |
| LLFS                                                                                            | 34/145***  | 10-fold | 93.8   | 88/95     | A   | SVM          | Linear kernel | ✓✓✓✓ | [326] |
| RFE                                                                                             | 530/573*   | 5-fold  | 71.6   | -         | B+C | FCNN         | -             | ×✓✓✓ | [327] |
| None                                                                                            | 325/325*   | 5-fold  | 59     | -         | B+C | SVM          | Linear kernel | ×✓✓✓ | [328] |
| Manual                                                                                          | 1060/1166* | 75:25   | AUC 79 | -         | B+C | LR           | Simple LR     | ×✓✓✓ | [329] |
| VBM                                                                                             | 21/20      | LOOCV   | -      | 81/65     | B   | SVM          | Linear kernel | ✓✓✓✓ | [330] |
| Volume-based morphological features + Clinical data                                             |            |         |        |           |     |              |               |      |       |
| Manual                                                                                          | 220/303*   | 4-fold  | 64     | 63/64     | All | SVM          | Not mentioned | ×??✓ | [331] |
| Histogram of oriented gradients                                                                 |            |         |        |           |     |              |               |      |       |
| Threshold                                                                                       | 55/209***  | 10-fold | 76.2   | -         | B   | CNN          | Multi-channel | ✓×✓✓ | [332] |
| LLFS                                                                                            | 119/131*   | 10-fold | 65     | 73/58     | B+C | SVM          | Linear kernel | ×?✓✓ | [333] |
| Path signature + Clinical data                                                                  |            |         |        |           |     |              |               |      |       |
| None                                                                                            | 30/30      | 10-fold | 87     | 83/90     | A   | FCNN         | SFCNN         | ✓✓✓✓ | [334] |
| Curvelet sub-bands                                                                              |            |         |        |           |     |              |               |      |       |
| WT                                                                                              | 76/75*     | 10-fold | AUC 75 | 77/82     | B   | SVM          | RBF kernel    | ✓✓✓✓ | [335] |
| Voxel density                                                                                   |            |         |        |           |     |              |               |      |       |
| t test                                                                                          | 81/50      | LOOCV   | 73.3   | 71.6/76   | B   | Ensemble     | -             | ×✓×? | [336] |
| Volume-based morphological features + Voxel density                                             |            |         |        |           |     |              |               |      |       |
| None                                                                                            | 30/28*     | 10-fold | 82     | 82.4/81.7 | B+C | CNN          | 3D Grad-CAM   | ?✓×✓ | [337] |
| Histogram of oriented gradients + Clinical data                                                 |            |         |        |           |     |              |               |      |       |
| MRMR                                                                                            | 538/573*   | 80:20   | 64.1   | 75.7/51.9 | B+C | SVM          | RBF kernel    | ×✓✓✓ | [191] |
| Structural covariance network                                                                   |            |         |        |           |     |              |               |      |       |
| None                                                                                            | 518/567*   | 10-fold | 71.8   | 81.3/68.8 | B+C | CNN          | ResNet        | ×✓✓✓ | [338] |
| Morphological brain networks                                                                    |            |         |        |           |     |              |               |      |       |

|             |          |         |      |   |     |          |               |      |       |
|-------------|----------|---------|------|---|-----|----------|---------------|------|-------|
| LLFS        | 155/186* | 10-fold | 76.7 | - | B+C | GNN      | Hypergraph    | ×✓✓✓ | [339] |
| None        | 155/186* | 10-fold | 62.4 | - | B+C | Ensemble | -             | ×✓✓✓ | [340] |
| Graph based | 155/186* | 10-fold | 52   | - | B+C | SVM      | Linear kernel | ??✓✓ | [341] |

## T-fMRI

| Feature Selection <sup>2</sup>       | ASD/TD   | Validation | Accuracy | Sen/Spe   | Age | Classifier <sup>3</sup> | AI Spec <sup>4</sup> | Risk of bias | Reference |
|--------------------------------------|----------|------------|----------|-----------|-----|-------------------------|----------------------|--------------|-----------|
| Dynamic bodies attention task        |          |            |          |           |     |                         |                      |              |           |
| RFE                                  | 15/14    | LOOCV      | 92.3     | 92.3/92.3 | C   | SVM                     | Linear kernel        | ✓✓✓✓         | [342]     |
| Social and non-social attention task |          |            |          |           |     |                         |                      |              |           |
| t test                               | 23/22    | LOOCV      | 90       | -         | B   | SVM                     | Linear kernel        | ✓✓✓✓         | [343]     |
| Thinking about social interactions   |          |            |          |           |     |                         |                      |              |           |
| Manual                               | 17/17*** | LOOCV      | 97       | -         | C   | NB                      | Gaussian             | ✓✓✓✓         | [344]     |
| Biopoint task                        |          |            |          |           |     |                         |                      |              |           |
| Manual                               | 82/48    | 85:7:8     | 87.1     | -         | -   | CNN                     | 2C 3D CNN            | ??✓?         | [345]     |
| None                                 | 72/43    | 60:20:20   | 79.8     | 72.6/85.4 | -   | GNN                     | BrainGNN             | ??✓✓         | [346]     |
| Graph based                          | 75/43    | 80:20      | 76       | 82/68.8   | -   | GNN                     | -                    | ??✓?         | [347]     |
| PCA                                  | 82/48    | 85:7:8     | F 89     | -         | -   | CNN                     | 2C 3D CNN            | ??✓?         | [348]     |
| Biological motion perception task    |          |            |          |           |     |                         |                      |              |           |
| Bootstrap                            | 21/19    | 10-fold    | 64.5     | 70.7/60.9 | B   | LSTM                    | -                    | ??×?         | [349]     |
| Language task + Theory of mind task  |          |            |          |           |     |                         |                      |              |           |
| Manual-t test                        | 13/14    | LOOCV      | 96.3     | -         | C   | LR                      | Simple LR            | ✓✓✓✓         | [350]     |
| Cognitive control task               |          |            |          |           |     |                         |                      |              |           |
| Manual                               | 29/29    | LOOCV      | 82.8     | 82.8/82.8 | -   | LR                      | Simple LR            | ??✓×         | [351]     |
| Language task                        |          |            |          |           |     |                         |                      |              |           |
| LLFS                                 | 30/30*** | -          | 75.8     | 74.8/76.7 | B   | SNCAE                   | -                    | ??✓✓         | [352]     |
| Response to speech                   |          |            |          |           |     |                         |                      |              |           |
| LLFS-WT                              | 50/50*** | 4-fold     | 86       | 82/92     | B   | CNN                     | 2D CNN               | ✓✓✓✓         | [353]     |
| LLFS-WT                              | 50/50*** | 10-fold    | 80       | 84/76     | B   | CNN                     | 2D CNN               | ✓✓✓✓         | [354]     |
| LLFS-WT-Manual                       | 33/33*** | 4-fold     | 77.2     | 78.1/76.5 | B   | CNN                     | 1D CNN               | ✓✓✓✓         | [355]     |

## Other Modalities

| Feature Selection <sup>2</sup>        | ASD/TD | Validation | Accuracy | Sen/Spe   | Age | Classifier <sup>3</sup> | AI Spec <sup>4</sup> | Risk of bias | Reference |
|---------------------------------------|--------|------------|----------|-----------|-----|-------------------------|----------------------|--------------|-----------|
| Functional near-infrared spectroscopy |        |            |          |           |     |                         |                      |              |           |
| None                                  | 22/22  | 70:30      | 95.7     | 97.1/94.3 | B   | Ensemble                | LSTM + CNN           | ×✓✓✓         | [356]     |

|        |       |          |      |           |   |          |               |      |       |
|--------|-------|----------|------|-----------|---|----------|---------------|------|-------|
| None   | 25/22 | 60:20:20 | 92.2 | 85/99.4   | B | Ensemble | GRU + CNN     | ×✓✓✓ | [357] |
| Manual | 25/22 | 50:50    | 91.9 | 81.6/94.6 | B | SVM      | Linear kernel | ×✓✓✓ | [358] |

### Kinematic features

|            |       |         |        |           |   |          |               |      |       |
|------------|-------|---------|--------|-----------|---|----------|---------------|------|-------|
| Manual     | 15/15 | LOOCV   | 96.7   | 100/93.8  | B | SVM      | Linear kernel | ✓-✓✓ | [359] |
| t test-FFS | 18/20 | LOOCV   | 92.1   | 88.9/95   | B | DT       | -             | ?-✓✓ | [360] |
| t test-FFS | 20/23 | LOOCV   | 88.4   | 85/91.3   | B | KNN      | -             | ✓-✓✓ | [361] |
| Manual     | 16/16 | 10-fold | 86.7   | 85.7/87.5 | C | SVM      | Linear kernel | ✓-×✓ | [362] |
| FDR        | 37/45 | 10-fold | AUC 93 | 83/85     | B | Ensemble | RGF           | ✓-✓✓ | [363] |

### Response to name

|     |       |       |    |          |   |    |   |      |       |
|-----|-------|-------|----|----------|---|----|---|------|-------|
| PCA | 22/21 | 75:25 | 93 | 100/92.3 | B | DT | - | ✓-✓✓ | [364] |
|-----|-------|-------|----|----------|---|----|---|------|-------|

### Video analysis

|        |        |         |      |           |   |      |           |      |       |
|--------|--------|---------|------|-----------|---|------|-----------|------|-------|
| Manual | 149/79 | 70:30   | 88.9 | 94.5/77.4 | B | LR   | Simple LR | ×-✓? | [365] |
| LLFS   | 9/124  | 75:8:17 | 82   | 92/71     | A | FCNN | -         | ?-✓✓ | [366] |

### Taking photos

|      |       |          |      |   |   |     |             |      |       |
|------|-------|----------|------|---|---|-----|-------------|------|-------|
| None | 16/21 | 60:20:20 | 83.7 | - | C | CNN | VGG-16 + TL | ✓-✓✓ | [367] |
|------|-------|----------|------|---|---|-----|-------------|------|-------|

### Vocal analysis

|        |           |       |      |         |   |          |    |      |       |
|--------|-----------|-------|------|---------|---|----------|----|------|-------|
| Manual | 1355/1257 | 45:55 | 86.5 | 84/89.2 | B | Ensemble | RF | ?-✓✓ | [368] |
|--------|-----------|-------|------|---------|---|----------|----|------|-------|

### PET scan

|     |       |       |    |       |   |     |   |      |       |
|-----|-------|-------|----|-------|---|-----|---|------|-------|
| RFE | 45/13 | LOOCV | 88 | 91/77 | B | LDA | - | ✓✓✓✓ | [369] |
|-----|-------|-------|----|-------|---|-----|---|------|-------|

## Multimodal

| Feature Selection <sup>2</sup> | ASD/TD    | Validation | Accuracy | Sen/Sp    | Age | Classifier <sup>3</sup> | AI Spec <sup>4</sup> | Risk of bias | Reference |
|--------------------------------|-----------|------------|----------|-----------|-----|-------------------------|----------------------|--------------|-----------|
| rs-fMRI + S-MRI                |           |            |          |           |     |                         |                      |              |           |
| Manual                         | 27/24*    | 70:30      | 97.8     | 98/97.6   | B   | CNN                     | TPNAS-Net            | ✓✓✓✓         | [370]     |
| F score-AE                     | 368/449*  | 10-fold    | 85.1     | 81/89     | B+C | FCNN                    | -                    | ×✓✓✓         | [371]     |
| LLFS                           | 72/113*** | 4-fold     | 80.8     | 84.9/79.2 | B   | Ensemble                | RF                   | ✓✓✓✓         | [372]     |
| SMF-Graph based                | 201/251*  | 95:5       | 74.8     | -         | B   | DT                      | -                    | ?✓✓✓         | [373]     |
| LLFS                           | 561/521*  | -          | 73       | -         | B+C | Ensemble                | RF                   | ×✓?✓         | [374]     |
| None                           | 481/526*  | 10-fold    | 72.7     | 67.8/76.6 | B+C | GNN                     | ANE + FCNN           | ×✓✓✓         | [375]     |
| PCA-MRMR                       | 127/153*  | 80:20      | 70       | -         | B   | Ensemble                | RF                   | ✓✓✓✓         | [376]     |
| None                           | 116/69*   | 10-fold    | 65.6     | 84/33     | B   | DBN                     | -                    | ?✓✓✓         | [377]     |
| AE-LLFS-PCA-ICA                | 538/573*  | 70:30      | 64.3     | 60/68.3   | B+C | SVM                     | Multi kernel         | ×✓✓✓         | [378]     |
| VAE-LLFS                       | 539/573*  | -          | 62.6     | -         | B+C | GNN                     | -                    | ×✓?✓         | [379]     |

### rs-fMRI + DWI/DTI

|                                         |           |         |      |           |     |          |               |      |       |
|-----------------------------------------|-----------|---------|------|-----------|-----|----------|---------------|------|-------|
| Graph based                             | 403/468*  | 80:20   | 60.9 | 53.5/69.4 | B+C | SVM      | RBF kernel    | ×✓✓✓ | [380] |
| <b>rs-fMRI + S-MRI + DWI/DTI</b>        |           |         |      |           |     |          |               |      |       |
| LLFS                                    | 46/47     | 66:33   | 92.5 | 97.8/87.2 | B   | Ensemble | CRF           | ✓✓✓✓ | [381] |
| LLFS                                    | 31/23*    | LOOCV   | 72.3 | -         | B   | SVM      | Linear kernel | ?✓✓✓ | [382] |
| <b>T-fMRI + DWI/DTI + Clinical data</b> |           |         |      |           |     |          |               |      |       |
| RFE-LLFS-t test                         | 15/15     | 53:47   | 95.9 | 96.9/94.8 | B+C | SVM      | Linear kernel | ?✓✓✓ | [383] |
| <b>S-MRI + DWI/DTI</b>                  |           |         |      |           |     |          |               |      |       |
| PCA                                     | 110/83*** | 10-fold | 93.3 | 93.6/96.2 | B   | SVM      | RBF kernel    | ✓✓✓✓ | [384] |
| RFE                                     | 58/48     | 5-fold  | 88.8 | 93/83.8   | B   | Ensemble | RF            | ✓✓✓✓ | [385] |
| t test                                  | 16/16     | LOOCV   | 86.7 | 87.3/86.1 | B   | SVM      | RBF kernel    | ✓✓✓✓ | [386] |
| VBM                                     | 14/33     | 70:30   | 75.3 | 24.8/97   | B   | Ensemble | RF            | ✓✓✓✓ | [387] |
| <b>EEG + Eye tracking</b>               |           |         |      |           |     |          |               |      |       |
| PCA-FFS                                 | 24/28     | 80:20   | 100  | -         | -   | NB       | Gaussian      | ?✓✓? | [388] |
| None                                    | 21/21     | 80:20   | 95   | 95/95     | B   | GNN      | GFT + FCNN    | ✓✓✓? | [389] |
| MRMR                                    | 49/48     | -       | 85.4 | -         | B   | SVM      | Linear kernel | ✓✓?✓ | [390] |
| <b>rs-fMRI + Genetic</b>                |           |         |      |           |     |          |               |      |       |
| RFE-t test                              | 47/24***  | LOOCV   | 86   | 81/88     | B+C | SVM      | Multi kernel  | ✓✓✓✓ | [391] |
| <b>Kinematic + Eye tracking</b>         |           |         |      |           |     |          |               |      |       |
| t test-LLFS                             | 22/22     | 68:32   | 78   | 57/99     | C   | SVM      | RBF kernel    | ✓-✓× | [392] |
| <b>S-MRI + DTI + MRS</b>                |           |         |      |           |     |          |               |      |       |
| RFE                                     | 19/18     | LOOCV   | 91.9 | -         | C   | DT       | -             | ✓✓✓✓ | [393] |

Acc: Accuracy, ASD: Autism spectrum disorder, LOOCV: Leave-one-out cross-validation, Sen: Sensitivity, Spe: Specificity, TD: Typically developing.

DWI/DTI: Diffusion-weighted imaging/Diffusion-tensor imaging, EEG: Electroencephalography, rs-fMRI: Resting-state functional magnetic resonance imaging, S-MRI: Structural magnetic resonance imaging, T-fMRI: Task-based functional magnetic resonance imaging.

The classifications for the age are A: Toddlers (<2y), B: Children and adolescents (2-18y), C: Adults (>18y).

For the risk of bias, the first dot on the left is indicative of the patient selection domain, next is for the index test (modality) domain, next one is for the index test (AI algorithm) domain, and the last one on the right is indicative of the reference standard domain. ✓ means low risk of bias, ? means unclear risk of bias, × means high risk of bias, and - means that domain is not applicable for the study.

\* Data is from the ABIDE dataset

\*\* Data is from the Kaggle dataset.

\*\*\* Data is from the NDAR dataset.

**1:** AAL: Automated anatomical labelling atlas, BASC: Bootstrap analysis of stable clusters, CC200: Craddock-200 atlas, CC400: Craddock-400 atlas, DES: Destrieux atlas, DK: Desikan–Killiany atlas, DLA: Dictionary learning algorithm, DOS: Dosenbach atlas, HBM: Hierarchical Bayesian model, HO: Harvard-Oxford atlas, IP-TFP: Instantaneous phase transfer function perturbation, RBS: Region based segmentation, RSN: Resting-state networks, SBC: Social brain connectome atlas

**2:** AE: Autoencoder, BOF: Bag of feature, BS: Bootstrapping, DL: Dictionary learning, DR: Dual regression, DSM: Dominant-sequence model, EIIC: Extended invariant information clustering, EW: Element-wise filters, FFS: Forward feature selection, GA: Genetic algorithm, GARCH: Generalized autoregressive conditional heteroscedasticity, HMM: Hidden Markov model, IBP: Indian buffet processes, ICA: Independent component analysis, L1SCCA: L1-norm regularized sparse canonical correlation analysis, LASSO: Least absolute shrinkage and selector operation, LEAN: Layer-wise elimination of accessory nodes, LLFS: Local learning-based feature selection, MCNFD: Multi-site clustering and nested feature extraction, MI: Mutual information, MRMR: Maximal relevance and minimal redundancy, MSDL: Multi-subject dictionary learning, MSTEPS: Multiscale stepwise selection, PCA: Principal component analysis, RFE: Recursive feature elimination, S2n: Signal to noise ratio, SLR: Sparse low-rank representation, SMF: Spatial feature based detection, VBM: Voxel based morphometry, WT: Wavelet transform

**3:** AE: Autoencoder, CNN: Convolutional neural network, DBN: Deep belief network, DFA: Discriminant factor analysis, DNN: Deep neural network, DRBM: Discriminative restricted Boltzmann machine, DT: Decision tree, FCNN: Fully-connected neural network, FLDA: Fisher's linear discriminant analysis, GNN: Graph neural network, KNN: K-nearest neighbors, LDA: Linear discriminant analysis, LMT: Logistic model trees, NB: Naïve Bayes, LR: Logistic regression, LSTM: Long-short term memory, PNN: Probabilistic neural network, PSN-ANFIS: Particle swarm optimization-Adaptive network-based fuzzy inference system, PTN: Prototypical network, QDA: Quadratic discriminant analysis, RNN: Recurrent neural network, RR: Ridge regression, SNCAE: Stacked nonnegativity constraint autoencoder, Sparse-MVTC: Sparse multi-view task-centralized learning, STA: Scanpath trend analysis, SVM: Support vector machine, VMM: Variable-order Markov model

**4:** AE: Autoencoder, ANE: Attention-based node-edge, CNN: Convolutional neural network, CRF: Conditional random forest, DANN: Deep attention neural network, FCNN: Fully-connected neural network, GAT: Graph attention network, GFT: Graph Fourier transform, GRU: Gate recurrent unit, hi-GCN: Hierarchical graph convolutional network, ID: Invertible dynamic, LR: Logistic regression, LR-GCN: Low-rank subspace graph convolutional network, LSTM: Long-short term memory, MT: Multi template, PBL-McRBFN: Projection based learning metacognitive radial basis function network, PLS: Partial least squares, PNN: Probabilistic neural network, PTN: Prototypical network, RBF: Radial basis function, RF: Random forest, RGF: Regularized greedy forest, RNN: Recurrent neural network, s-GCN: Siamese graph convolutional network, SAE: Sparse autoencoder, SFCNN: Siamese fully connected neural network, Sparse-MVTC: Sparse multi-view task-centralized learning, TL: Transfer learning, TPNAS-Net: Topology preserving neural architecture search network

---

# Bibliography

- ] X. Bi, J. Chen, Q. Sun, Y. Liu, Y. Wang, and X. Luo, 'Analysis of Asperger Syndrome Using Genetic-Evolutionary Random Support Vector Machine Cluster', *Front Physiol*, vol. 9, p. 1646, Nov. 2018, doi: 10.3389/fphys.2018.01646.
- ] R. W. Emerson *et al.*, 'Functional neuroimaging of high-risk 6-month-old infants predicts a diagnosis of autism at 24 months of age', *Sci Transl Med*, vol. 9, no. 393, p. eaag2882, Jun. 2017, doi: 10.1126/scitranslmed.aag2882.
- ] C. Wang, Z. Xiao, B. Wang, and J. Wu, 'Identification of Autism Based on SVM-RFE and Stacked Sparse Auto-Encoder', *IEEE Access*, vol. 7, pp. 118030–118036, 2019, doi: 10.1109/ACCESS.2019.2936639.
- ] A. M. Mahmoud and H. Karamti, 'Classifying a type of brain disorder in children: an effective fMRI based deep attempt', *Indonesian Journal of Electrical Engineering and Computer Science*, vol. 22, no. 1, p. 260, Apr. 2021, doi: 10.11591/ijeecs.v22.i1.pp260-269.
- ] C. P. Chen *et al.*, 'Diagnostic classification of intrinsic functional connectivity highlights somatosensory, default mode, and visual regions in autism', *Neuroimage Clin*, vol. 8, pp. 238–245, 2015, doi: 10.1016/j.nicl.2015.04.002.
- ] C. Wang, Z. Xiao, and J. Wu, 'Functional connectivity-based classification of autism and control using SVM-RFECV on rs-fMRI data', *Physica Medica*, vol. 65, pp. 99–105, Sep. 2019, doi: 10.1016/j.ejmp.2019.08.010.
- ] T. Iidaka, 'Resting state functional magnetic resonance imaging and neural network classified autism and control', *Cortex*, vol. 63, pp. 55–67, Feb. 2015, doi: 10.1016/j.cortex.2014.08.011.
- ] Y. Zhang *et al.*, 'Self-Paced Learning and Privileged Information based Cascaded Multi-column Classification algorithm for ASD diagnosis', in *2021 43rd Annual International Conference of the IEEE Engineering in Medicine & Biology Society (EMBC)*, Nov. 2021, pp. 3281–3284. doi: 10.1109/EMBC46164.2021.9630150.
- ] V. Subbaraju, S. Sundaram, and S. Narasimhan, 'Identification of lateralized compensatory neural activities within the social brain due to autism spectrum disorder in adolescent males', *European Journal of Neuroscience*, vol. 47, no. 6, pp. 631–642, Mar. 2018, doi: 10.1111/ejn.13634.
- ] F. Huang *et al.*, 'Self-weighted adaptive structure learning for ASD diagnosis via multi-template multi-center representation', *Med Image Anal*, vol. 63, p. 101662, Jul. 2020, doi: 10.1016/j.media.2020.101662.
- ] X. Guo, K. C. Dominick, A. A. Minai, H. Li, C. A. Erickson, and L. J. Lu, 'Diagnosing Autism Spectrum Disorder from Brain Resting-State Functional Connectivity Patterns Using a Deep Neural Network with a Novel Feature Selection Method', *Front Neurosci*, vol. 11, p. 460, Aug. 2017, doi: 10.3389/fnins.2017.00460.
- ] N. Yahata *et al.*, 'A small number of abnormal brain connections predicts adult autism spectrum disorder', *Nat Commun*, vol. 7, no. 1, p. 11254, Sep. 2016, doi: 10.1038/ncomms11254.
- ] X. Li, Y. Gu, N. Dvornek, L. H. Staib, P. Ventola, and J. S. Duncan, 'Multi-site fMRI analysis using privacy-preserving federated learning and domain adaptation: ABIDE results', *Med Image Anal*, vol. 65, p. 101765, Oct. 2020, doi: 10.1016/j.media.2020.101765.
- ] H. Sewani and R. Kashef, 'An Autoencoder-Based Deep Learning Classifier for Efficient Diagnosis of Autism', *Children*, vol. 7, no. 10, p. 182, Oct. 2020, doi: 10.3390/children7100182.
- ] N. A. Khan, S. A. Waheeb, A. Riaz, and X. Shang, 'A Three-Stage Teacher, Student Neural Networks and Sequential Feed Forward Selection-Based Feature Selection Approach for the Classification of Autism Spectrum Disorder', *Brain Sci*, vol. 10, no. 10, p. 754, Oct. 2020, doi: 10.3390/brainsci10100754.
- ] F. Huang, A. Elazab, L. OuYang, J. Tan, T. Wang, and B. Lei, 'Sparse Low-rank Constrained Adaptive Structure Learning using Multi-template for Autism Spectrum Disorder Diagnosis', in *2019 IEEE 16th International Symposium on Biomedical Imaging (ISBI 2019)*, Apr. 2019, pp. 1555–1558. doi: 10.1109/ISBI.2019.8759487.
- ] B. Li, A. Sharma, J. Meng, S. Purushwalkam, and E. Gowen, 'Applying machine learning to identify autistic adults using imitation: An exploratory study', *PLoS One*, vol. 12, no. 8, p. e0182652, Aug. 2017, doi: 10.1371/journal.pone.0182652.
- ] B. S. Mahanand, S. Vigneshwaran, S. Suresh, and N. Sundararajan, 'An enhanced effect-size thresholding method for the diagnosis of Autism Spectrum Disorder using resting state functional MRI', in *2016 Second International Conference on Cognitive Computing and Information Processing (CCIP)*, Aug. 2016, pp. 1–6. doi: 10.1109/CCIP.2016.7802874.
- ] D. K and V. R. Murthy Oruganti, 'A Machine Learning Approach for Diagnosing Neurological Disorders using Longitudinal Resting-State fMRI', in *2021 11th International Conference on Cloud Computing, Data Science & Engineering (Confluence)*, Jan. 2021, pp. 494–499. doi: 10.1109/Confluence51648.2021.9377173.



- 1] F. Z. Benabdallah, A. D. El Maliani, and M. El Hassouni, 'A CNN Based 3D Connectivity Matrices Features for Autism Detection: Application on ABIDE I', in *Ubiquitous Networking*, 2021, pp. 293–302. doi: 10.1007/978-3-030-86356-2\_24.
- 2] Z. Dai, H. Zhang, F. Lin, S. Feng, Y. Wei, and J. Zhou, 'The Classification System and Biomarkers for Autism Spectrum Disorder: A Machine Learning Approach', in *Bioinformatics Research and Applications*, 2021, pp. 289–299. doi: 10.1007/978-3-030-91415-8\_25.
- 3] H. Huang, X. Liu, Y. Jin, S. Lee, C. Wee, and D. Shen, 'Enhancing the representation of functional connectivity networks by fusing multi-view information for autism spectrum disorder diagnosis', *Hum Brain Mapp*, vol. 40, no. 3, pp. 833–854, Feb. 2019, doi: 10.1002/hbm.24415.
- 4] L. Boppana, N. Shabnam, and T. Srivatsava, 'Deep Learning Approach for an early stage detection of Neurodevelopmental Disorders', in *2021 IEEE 9th Region 10 Humanitarian Technology Conference (R10-HTC)*, Sep. 2021, pp. 1–6. doi: 10.1109/R10-HTC53172.2021.9641691.
- 5] H. Chen *et al.*, 'Multivariate classification of autism spectrum disorder using frequency-specific resting-state functional connectivity—A multi-center study', *Prog Neuropsychopharmacol Biol Psychiatry*, vol. 64, pp. 1–9, Jan. 2016, doi: 10.1016/j.pnpbp.2015.06.014.
- 6] W. Yin, S. Mostafa, and F. Wu, 'Diagnosis of Autism Spectrum Disorder Based on Functional Brain Networks with Deep Learning', *Journal of Computational Biology*, vol. 28, no. 2, pp. 146–165, Feb. 2021, doi: 10.1089/cmb.2020.0252.
- 7] M. Plitt, K. A. Barnes, and A. Martin, 'Functional connectivity classification of autism identifies highly predictive brain features but falls short of biomarker standards', *Neuroimage Clin*, vol. 7, pp. 359–366, 2015, doi: 10.1016/j.nicl.2014.12.013.
- 8] J. S. Anderson *et al.*, 'Functional connectivity magnetic resonance imaging classification of autism', *Brain*, vol. 134, no. 12, pp. 3742–3754, Dec. 2011, doi: 10.1093/brain/awr263.
- 9] V. Subbaraju, M. B. Suresh, S. Sundaram, and S. Narasimhan, 'Identifying differences in brain activities and an accurate detection of autism spectrum disorder using resting state functional-magnetic resonance imaging : A spatial filtering approach', *Med Image Anal*, vol. 35, pp. 375–389, Jan. 2017, doi: 10.1016/j.media.2016.08.003.
- 10] M. Jung *et al.*, 'Surface-based shared and distinct resting functional connectivity in attention-deficit hyperactivity disorder and autism spectrum disorder', *The British Journal of Psychiatry*, vol. 214, no. 06, pp. 339–344, Jun. 2019, doi: 10.1192/bjp.2018.248.
- 11] A. Mahmoud, H. Karamti, and F. Alrowais, 'An Effective Sparse Autoencoders based Deep Learning Framework for fMRI Scans Classification', in *Proceedings of the 22nd International Conference on Enterprise Information Systems*, 2020, pp. 540–547. doi: 10.5220/0009397605400547.
- 12] S. Shrivastava, U. Mishra, N. Singh, A. Chandra, and S. Verma, 'Control or Autism - Classification using Convolutional Neural Networks on Functional MRI', in *2020 11th International Conference on Computing, Communication and Networking Technologies (ICCCNT)*, Jul. 2020, pp. 1–6. doi: 10.1109/ICCCNT49239.2020.9225506.
- 13] X. Yang, P. T., and N. Zhang, 'A Deep Neural Network Study of the ABIDE Repository on Autism Spectrum Classification', *International Journal of Advanced Computer Science and Applications*, vol. 11, no. 4, pp. 1–6, 2020, doi: 10.14569/IJACSA.2020.0110401.
- 14] B. Yamagata *et al.*, 'Machine learning approach to identify a resting-state functional connectivity pattern serving as an endophenotype of autism spectrum disorder', *Brain Imaging Behav*, vol. 13, no. 6, pp. 1689–1698, Dec. 2019, doi: 10.1007/s11682-018-9973-2.
- 15] Y. Wang, J. Wang, F.-X. Wu, R. Hayrat, and J. Liu, 'ALMAFE: Autism spectrum disorder identification with multi-atlas deep feature representation and ensemble learning', *J Neurosci Methods*, vol. 343, p. 108840, Sep. 2020, doi: 10.1016/j.jneumeth.2020.108840.
- 16] M. Tang, P. Kumar, H. Chen, and A. Shrivastava, 'Deep Multimodal Learning for the Diagnosis of Autism Spectrum Disorder', *J Imaging*, vol. 6, no. 6, p. 47, Jun. 2020, doi: 10.3390/jimaging6060047.
- 17] J. F. Agastinose Ronicko, J. Thomas, P. Thangavel, V. Koneru, G. Langs, and J. Dauwels, 'Diagnostic classification of autism using resting-state fMRI data improves with full correlation functional brain connectivity compared to partial correlation', *J Neurosci Methods*, vol. 345, p. 108884, Nov. 2020, doi: 10.1016/j.jneumeth.2020.108884.
- 18] X. Yang, M. S. Islam, and A. M. A. Khaled, 'Functional connectivity magnetic resonance imaging classification of autism spectrum disorder using the multisite ABIDE dataset', in *2019 IEEE EMBS International Conference on Biomedical & Health Informatics (BHI)*, May 2019, pp. 1–4. doi: 10.1109/BHI.2019.8834653.

- 1] Z. Jiao, H. Li, and Y. Fan, 'Improving Diagnosis of Autism Spectrum Disorder and Disentangling its Heterogeneous Functional Connectivity Patterns Using Capsule Networks', in *2020 IEEE 17th International Symposium on Biomedical Imaging (ISBI)*, Apr. 2020, pp. 1331–1334. doi: 10.1109/ISBI45749.2020.9098524.
- 2] G. Spera *et al.*, 'Evaluation of Altered Functional Connections in Male Children With Autism Spectrum Disorders on Multiple-Site Data Optimized With Machine Learning', *Front Psychiatry*, vol. 10, p. 620, Sep. 2019, doi: 10.3389/fpsy.2019.00620.
- 3] J. Zhuang, N. C. Dvornek, X. Li, P. Ventola, and J. S. Duncan, 'Invertible Network for Classification and Biomarker Selection for ASD', in *International Conference on Medical Image Computing and Computer-Assisted Intervention*, Springer, 2019, pp. 700–708. doi: 10.1007/978-3-030-32248-9\_78.
- 4] S. Gupta, Y. H. Chan, and J. C. Rajapakse, 'Obtaining leaner deep neural networks for decoding brain functional connectome in a single shot', *Neurocomputing*, vol. 453, pp. 326–336, Sep. 2021, doi: 10.1016/j.neucom.2020.04.152.
- 5] J. Zhang, F. Feng, T. Han, X. Gong, and F. Duan, 'Detection of Autism Spectrum Disorder using fMRI Functional Connectivity with Feature Selection and Deep Learning', *Cognit Comput*, Jan. 2022, doi: 10.1007/s12559-021-09981-z.
- 6] F. Almuqhim and F. Saeed, 'ASD-SAENet: A Sparse Autoencoder, and Deep-Neural Network Model for Detecting Autism Spectrum Disorder (ASD) Using fMRI Data', *Front Comput Neurosci*, vol. 15, p. 654315, Apr. 2021, doi: 10.3389/fncom.2021.654315.
- 7] A. Jahedi, C. A. Nasamran, B. Faires, J. Fan, and R.-A. Müller, 'Distributed Intrinsic Functional Connectivity Patterns Predict Diagnostic Status in Large Autism Cohort', *Brain Connect*, vol. 7, no. 8, pp. 515–525, Oct. 2017, doi: 10.1089/brain.2017.0496.
- 8] P. Lanka, D. Rangaprakash, M. N. Dretsches, J. S. Katz, T. S. Denney, and G. Deshpande, 'Supervised machine learning for diagnostic classification from large-scale neuroimaging datasets', *Brain Imaging Behav*, vol. 14, no. 6, pp. 2378–2416, Dec. 2020, doi: 10.1007/s11682-019-00191-8.
- 9] Y. Zhao, F. Ge, S. Zhang, and T. Liu, '3D Deep Convolutional Neural Network Revealed the Value of Brain Network Overlap in Differentiating Autism Spectrum Disorder from Healthy Controls', in *Medical Image Computing and Computer Assisted Intervention – MICCAI 2018*, 2018, pp. 172–180. doi: 10.1007/978-3-030-00931-1\_20.
- 10] H. Li, N. A. Parikh, and L. He, 'A Novel Transfer Learning Approach to Enhance Deep Neural Network Classification of Brain Functional Connectomes', *Front Neurosci*, vol. 12, p. 491, Jul. 2018, doi: 10.3389/fnins.2018.00491.
- 11] T. Eslami, V. Mirjalili, A. Fong, A. R. Laird, and F. Saeed, 'ASD-DiagNet: A Hybrid Learning Approach for Detection of Autism Spectrum Disorder Using fMRI Data', *Front Neuroinform*, vol. 13, p. 70, Nov. 2019, doi: 10.3389/fninf.2019.00070.
- 12] Z. Sherkatghanad *et al.*, 'Automated Detection of Autism Spectrum Disorder Using a Convolutional Neural Network', *Front Neurosci*, vol. 13, p. 1325, Jan. 2020, doi: 10.3389/fnins.2019.01325.
- 13] N. Chaitra, P. A. Vijaya, and G. Deshpande, 'Diagnostic prediction of autism spectrum disorder using complex network measures in a machine learning framework', *Biomed Signal Process Control*, vol. 62, p. 102099, Sep. 2020, doi: 10.1016/j.bspc.2020.102099.
- 14] A. S. Heinsfeld, A. R. Franco, R. C. Craddock, A. Buchweitz, and F. Meneguzzi, 'Identification of autism spectrum disorder using deep learning and the ABIDE dataset', *Neuroimage Clin*, vol. 17, pp. 16–23, 2018, doi: 10.1016/j.nicl.2017.08.017.
- 15] R. Bhaumik, A. Pradhan, S. Das, and D. K. Bhaumik, 'Predicting Autism Spectrum Disorder Using Domain-Adaptive Cross-Site Evaluation', *Neuroinformatics*, vol. 16, no. 2, pp. 197–205, Apr. 2018, doi: 10.1007/s12021-018-9366-0.
- 16] J. Hu, L. Cao, T. Li, B. Liao, S. Dong, and P. Li, 'Interpretable Learning Approaches in Resting-State Functional Connectivity Analysis: The Case of Autism Spectrum Disorder', *Comput Math Methods Med*, vol. 2020, pp. 1–12, May 2020, doi: 10.1155/2020/1394830.
- 17] W. Cancino, G. Africano, and S. Pertuz, 'A Benchmark of Preprocessing Strategies for Autism Classification from Resting-State Functional Magnetic Resonance Imaging', in *2021 XXIII Symposium on Image, Signal Processing and Artificial Vision (STSIVA)*, Sep. 2021, pp. 1–5. doi: 10.1109/STSIVA53688.2021.9592011.
- 18] W. Jung, D.-W. Heo, E. Jeon, J. Lee, and H.-I. Suk, 'Inter-regional High-Level Relation Learning from Functional Connectivity via Self-supervision', in *Medical Image Computing and Computer Assisted Intervention – MICCAI 2021*, 2021, pp. 284–293. doi: 10.1007/978-3-030-87196-3\_27.

- 15] M. Wang, D. Zhang, J. Huang, D. Shen, and M. Liu, 'Low-Rank Representation for Multi-center Autism Spectrum Disorder Identification', in *Med Image Comput Comput Assist Interv*, vol. 11070, 2018, pp. 647–654. doi: 10.1007/978-3-030-00928-1\_73.
- 16] Y. Liu, L. Xu, J. Li, J. Yu, and X. Yu, 'Attentional Connectivity-based Prediction of Autism Using Heterogeneous rs-fMRI Data from CC200 Atlas', *Exp Neurobiol*, vol. 29, no. 1, pp. 27–37, Feb. 2020, doi: 10.5607/en.2020.29.1.27.
- 17] T.-E. Kam, H.-I. Suk, and S.-W. Lee, 'Multiple functional networks modeling for autism spectrum disorder diagnosis', *Hum Brain Mapp*, vol. 38, no. 11, pp. 5804–5821, Nov. 2017, doi: 10.1002/hbm.23769.
- 18] J. M. Kernbach *et al.*, 'Shared endo-phenotypes of default mode dysfunction in attention deficit/hyperactivity disorder and autism spectrum disorder', *Transl Psychiatry*, vol. 8, no. 1, p. 133, Dec. 2018, doi: 10.1038/s41398-018-0179-6.
- 19] A. Abraham *et al.*, 'Deriving reproducible biomarkers from multi-site resting-state data: An Autism-based example', *Neuroimage*, vol. 147, pp. 736–745, Feb. 2017, doi: 10.1016/j.neuroimage.2016.10.045.
- 20] M. Leming, J. M. Górriz, and J. Suckling, 'Ensemble Deep Learning on Large, Mixed-Site fMRI Datasets in Autism and Other Tasks', *Int J Neural Syst*, vol. 30, no. 07, p. 2050012, Jul. 2020, doi: 10.1142/S0129065720500124.
- 21] N. Okamoto and H. Akama, 'Extended Invariant Information Clustering Is Effective for Leave-One-Site-Out Cross-Validation in Resting State Functional Connectivity Modeling', *Front Neuroinform*, vol. 15, p. 709179, Dec. 2021, doi: 10.3389/fninf.2021.709179.
- 22] X. Xing, J. Ji, and Y. Yao, 'Convolutional Neural Network with Element-wise Filters to Extract Hierarchical Topological Features for Brain Networks', in *2018 IEEE International Conference on Bioinformatics and Biomedicine (BIBM)*, Dec. 2018, pp. 780–783. doi: 10.1109/BIBM.2018.8621472.
- 23] A. J. Fredo, A. Jahedi, M. Reiter, and R.-A. Müller, 'Diagnostic classification of autism using resting-state fMRI data and conditional random forest', in *40th Annual International Conference of the IEEE Engineering in Medicine and Biology Society*, Jul. 2018, vol. 12, no. 2.76, pp. 6–41.
- 24] I. Mhiri and I. Rekik, 'Joint functional brain network atlas estimation and feature selection for neurological disorder diagnosis with application to autism', *Med Image Anal*, vol. 60, p. 101596, Feb. 2020, doi: 10.1016/j.media.2019.101596.
- 25] G. Xu and Y. Liang, 'A Novel Two-stage Prediction Model to Classify Functional Connectivity for Brain Disease Diagnosis', in *2021 IEEE 4th International Conference on Computer and Communication Engineering Technology (CCET)*, Aug. 2021, pp. 63–68. doi: 10.1109/CCET52649.2021.9544424.
- 26] P. Kassraian-Fard, C. Matthis, J. H. Balsters, M. H. Maathuis, and N. Wenderoth, 'Promises, Pitfalls, and Basic Guidelines for Applying Machine Learning Classifiers to Psychiatric Imaging Data, with Autism as an Example', *Front Psychiatry*, vol. 7, p. 177, Dec. 2016, doi: 10.3389/fpsy.2016.00177.
- 27] L. Doderer, H. Q. Minh, M. S. Biagio, V. Murino, and D. Sona, 'Kernel-based classification for brain connectivity graphs on the Riemannian manifold of positive definite matrices', in *2015 IEEE 12th International Symposium on Biomedical Imaging (ISBI)*, Apr. 2015, pp. 42–45. doi: 10.1109/ISBI.2015.7163812.
- 28] J. A. Nielsen *et al.*, 'Multisite functional connectivity MRI classification of autism: ABIDE results', *Front Hum Neurosci*, vol. 7, 2013, doi: 10.3389/fnhum.2013.00599.
- 29] K. Niu *et al.*, 'Multichannel Deep Attention Neural Networks for the Classification of Autism Spectrum Disorder Using Neuroimaging and Personal Characteristic Data', *Complexity*, vol. 2020, pp. 1–9, Jan. 2020, doi: 10.1155/2020/1357853.
- 30] M. A. Reiter, A. Jahedi, A. R. J. Fredo, I. Fishman, B. Bailey, and R.-A. Müller, 'Performance of machine learning classification models of autism using resting-state fMRI is contingent on sample heterogeneity', *Neural Comput Appl*, vol. 33, no. 8, pp. 3299–3310, Apr. 2021, doi: 10.1007/s00521-020-05193-y.
- 31] X. Bi *et al.*, 'The Genetic-Evolutionary Random Support Vector Machine Cluster Analysis in Autism Spectrum Disorder', *IEEE Access*, vol. 7, pp. 30527–30535, 2019, doi: 10.1109/ACCESS.2019.2902889.
- 32] X. Bi, Y. Wang, Q. Shu, Q. Sun, and Q. Xu, 'Classification of Autism Spectrum Disorder Using Random Support Vector Machine Cluster', *Front Genet*, vol. 9, p. 18, Feb. 2018, doi: 10.3389/fgene.2018.00018.

- [3] X. Bi, Y. Liu, Q. Jiang, Q. Shu, Q. Sun, and J. Dai, 'The Diagnosis of Autism Spectrum Disorder Based on the Random Neural Network Cluster', *Front Hum Neurosci*, vol. 12, p. 257, Jun. 2018, doi: 10.3389/fnhum.2018.00257.
- [4] A. Kazeminejad and R. C. Sotero, 'Topological Properties of Resting-State fMRI Functional Networks Improve Machine Learning-Based Autism Classification', *Front Neurosci*, vol. 12, p. 1018, Jan. 2019, doi: 10.3389/fnins.2018.01018.
- [5] P. Barttfeld *et al.*, 'State-dependent changes of connectivity patterns and functional brain network topology in autism spectrum disorder', *Neuropsychologia*, vol. 50, no. 14, pp. 3653–3662, Dec. 2012, doi: 10.1016/j.neuropsychologia.2012.09.047.
- [6] J.-W. Sun, R. Fan, Q. Wang, Q.-Q. Wang, X.-Z. Jia, and H.-B. Ma, 'Identify abnormal functional connectivity of resting state networks in Autism spectrum disorder and apply to machine learning-based classification', *Brain Res*, vol. 1757, p. 147299, Apr. 2021, doi: 10.1016/j.brainres.2021.147299.
- [7] C. Zu *et al.*, 'Identifying disease-related subnetwork connectome biomarkers by sparse hypergraph learning', *Brain Imaging Behav*, vol. 13, no. 4, pp. 879–892, Aug. 2019, doi: 10.1007/s11682-018-9899-8.
- [8] C. Shi, J. Zhang, and X. Wu, 'An fMRI Feature Selection Method Based on a Minimum Spanning Tree for Identifying Patients with Autism', *Symmetry (Basel)*, vol. 12, no. 12, p. 1995, Dec. 2020, doi: 10.3390/sym12121995.
- [9] S. Gupta, J. C. Rajapakse, and R. E. Welsch, 'Ambivert degree identifies crucial brain functional hubs and improves detection of Alzheimer's Disease and Autism Spectrum Disorder', *Neuroimage Clin*, vol. 25, p. 102186, 2020, doi: 10.1016/j.nicl.2020.102186.
- [10] R. Anirudh and J. J. Thiagarajan, 'Bootstrapping Graph Convolutional Neural Networks for Autism Spectrum Disorder Classification', in *ICASSP 2019 - 2019 IEEE International Conference on Acoustics, Speech and Signal Processing (ICASSP)*, May 2019, pp. 3197–3201. doi: 10.1109/ICASSP.2019.8683547.
- [11] L. Shao, C. Fu, Y. You, and D. Fu, 'Classification of ASD based on fMRI data with deep learning', *Cogn Neurodyn*, vol. 15, no. 6, pp. 961–974, Dec. 2021, doi: 10.1007/s11571-021-09683-0.
- [12] S. Mostafa, L. Tang, and F.-X. Wu, 'Diagnosis of Autism Spectrum Disorder Based on Eigenvalues of Brain Networks', *IEEE Access*, vol. 7, pp. 128474–128486, 2019, doi: 10.1109/ACCESS.2019.2940198.
- [13] Y. Chen, A. Liu, X. Fu, J. Wen, and X. Chen, 'An Invertible Dynamic Graph Convolutional Network for Multi-Center ASD Classification', *Front Neurosci*, vol. 15, p. 828512, Feb. 2022, doi: 10.3389/fnins.2021.828512.
- [14] Y. Wang, J. Liu, Y. Xiang, J. Wang, Q. Chen, and J. Chong, 'MAGE: Automatic diagnosis of autism spectrum disorders using multi-atlas graph convolutional networks and ensemble learning', *Neurocomputing*, vol. 469, pp. 346–353, Jan. 2022, doi: 10.1016/j.neucom.2020.06.152.
- [15] Y. Song, T. M. Epalle, and H. Lu, 'Characterizing and Predicting Autism Spectrum Disorder by Performing Resting-State Functional Network Community Pattern Analysis', *Front Hum Neurosci*, vol. 13, p. 203, Jun. 2019, doi: 10.3389/fnhum.2019.00203.
- [16] L. Zhang, J.-R. Wang, and Y. Ma, 'Graph Convolutional Networks via Low-Rank Subspace for Multi-Site rs-fMRI ASD Diagnosis', in *2021 14th International Congress on Image and Signal Processing, BioMedical Engineering and Informatics (CISP-BMEI)*, Oct. 2021, pp. 1–6. doi: 10.1109/CISP-BMEI53629.2021.9624374.
- [17] Z. Rakhimberdina, X. Liu, and T. Murata, 'Population Graph-Based Multi-Model Ensemble Method for Diagnosing Autism Spectrum Disorder', *Sensors*, vol. 20, no. 21, p. 6001, Oct. 2020, doi: 10.3390/s20216001.
- [18] M. Cao *et al.*, 'Using DeepGCN to identify the autism spectrum disorder from multi-site resting-state data', *Biomed Signal Process Control*, vol. 70, p. 103015, Sep. 2021, doi: 10.1016/j.bspc.2021.103015.
- [19] C. Yang, P. Wang, J. Tan, Q. Liu, and X. Li, 'Autism spectrum disorder diagnosis using graph attention network based on spatial-constrained sparse functional brain networks', *Comput Biol Med*, vol. 139, p. 104963, Dec. 2021, doi: 10.1016/j.compbimed.2021.104963.
- [20] S. Parisot *et al.*, 'Disease prediction using graph convolutional networks: Application to Autism Spectrum Disorder and Alzheimer's disease', *Med Image Anal*, vol. 48, pp. 117–130, Aug. 2018, doi: 10.1016/j.media.2018.06.001.

- [1] S. Ataei, N. Attar, S. Aliakbary, and F. Bakouie, 'Graph theoretical approach for screening autism on brain complex networks', *SN Appl Sci*, vol. 1, no. 9, p. 1122, Sep. 2019, doi: 10.1007/s42452-019-1079-y.
- [2] S. Parisot *et al.*, 'Spectral Graph Convolutions for Population-Based Disease Prediction', in *International conference on medical image computing and computer-assisted intervention*, Springer, 2017, pp. 177–185. doi: 10.1007/978-3-319-66179-7\_21.
- [3] C. J. Brown, J. Kawahara, and G. Hamarneh, 'Connectome priors in deep neural networks to predict autism', in *2018 IEEE 15th International Symposium on Biomedical Imaging (ISBI 2018)*, Apr. 2018, pp. 110–113. doi: 10.1109/ISBI.2018.8363534.
- [4] D. Yao *et al.*, 'Triplet Graph Convolutional Network for Multi-scale Analysis of Functional Connectivity Using Functional MRI', in *Graph Learning in Medical Imaging*, 2019, pp. 70–78. doi: 10.1007/978-3-030-35817-4\_9.
- [5] H. Jiang, P. Cao, M. Xu, J. Yang, and O. Zaiane, 'Hi-GCN: A hierarchical graph convolution network for graph embedding learning of brain network and brain disorders prediction', *Comput Biol Med*, vol. 127, p. 104096, Dec. 2020, doi: 10.1016/j.compbiomed.2020.104096.
- [6] E. Tolan and Z. Isik, 'Graph Theory Based Classification of Brain Connectivity Network for Autism Spectrum Disorder', in *Bioinformatics and Biomedical Engineering*, 2018, pp. 520–530. doi: 10.1007/978-3-319-78723-7\_45.
- [7] M. Sadeghi, R. Khosrowabadi, F. Bakouie, H. Mahdavi, C. Eslahchi, and H. Pouretamad, 'Screening of autism based on task-free fMRI using graph theoretical approach', *Psychiatry Res Neuroimaging*, vol. 263, pp. 48–56, May 2017, doi: 10.1016/j.psychresns.2017.02.004.
- [8] L. Doderio, F. Sambataro, V. Murino, and D. Sona, 'Kernel-Based Analysis of Functional Brain Connectivity on Grassmann Manifold', in *Medical Image Computing and Computer-Assisted Intervention – MICCAI 2015*, 2015, pp. 604–611. doi: 10.1007/978-3-319-24574-4\_72.
- [9] S. I. Ktena *et al.*, 'Metric learning with spectral graph convolutions on brain connectivity networks', *Neuroimage*, vol. 169, pp. 431–442, Apr. 2018, doi: 10.1016/j.neuroimage.2017.12.052.
- [10] A. Kazeminejad and R. C. Sotero, 'The Importance of Anti-correlations in Graph Theory Based Classification of Autism Spectrum Disorder', *Front Neurosci*, vol. 14, p. 676, Aug. 2020, doi: 10.3389/fnins.2020.00676.
- [11] K. Byeon, J. Kwon, J. Hong, and H. Park, 'Artificial Neural Network Inspired by Neuroimaging Connectivity: Application in Autism Spectrum Disorder', in *2020 IEEE International Conference on Big Data and Smart Computing (BigComp)*, Feb. 2020, pp. 575–578. doi: 10.1109/BigComp48618.2020.00013.
- [12] S. M. Jain, 'Detection of Autism using Magnetic Resonance Imaging data and Graph Convolutional Neural Networks', Rochester Institute of Technology, Rochester, 2018.
- [13] E. Jun and H.-I. Suk, *Connectomics in NeuroImaging*, vol. 10511. Cham: Springer International Publishing, 2017. doi: 10.1007/978-3-319-67159-8.
- [14] T. Price, C.-Y. Wee, W. Gao, and D. Shen, 'Multiple-Network Classification of Childhood Autism Using Functional Connectivity Dynamics', in *International Conference on Medical Image Computing and Computer-Assisted Intervention*, Springer, 2014, pp. 177–184. doi: 10.1007/978-3-319-10443-0\_23.
- [15] Z. Xiao, C. Wang, N. Jia, and J. Wu, 'SAE-based classification of school-aged children with autism spectrum disorders using functional magnetic resonance imaging', *Multimed Tools Appl*, vol. 77, no. 17, pp. 22809–22820, Sep. 2018, doi: 10.1007/s11042-018-5625-1.
- [16] M. Naghashzadeh, M. Yazdi, and A. Zolghadrasli, 'Classification of autism spectrum disorders individuals and controls using phase and envelope features from resting-state fMRI data', *Comput Methods Biomech Biomed Eng Imaging Vis*, vol. 10, no. 1, pp. 55–66, Jan. 2022, doi: 10.1080/21681163.2021.1972343.
- [17] M. I. Al-Hiyali, N. Yahya, I. Faye, Z. Khan, and K. Alsaih, 'Classification of BOLD FMRI Signals using Wavelet Transform and Transfer Learning for Detection of Autism Spectrum Disorder', in *2020 IEEE-EMBS Conference on Biomedical Engineering and Sciences (IECBES)*, Mar. 2021, pp. 94–98. doi: 10.1109/IECBES48179.2021.9398803.
- [18] F. Zhao, Z. Chen, I. Rekik, S.-W. Lee, and D. Shen, 'Diagnosis of Autism Spectrum Disorder Using Central-Moment Features From Low- and High-Order Dynamic Resting-State Functional Connectivity Networks', *Front Neurosci*, vol. 14, p. 258, Apr. 2020, doi: 10.3389/fnins.2020.00258.
- [19] X. Ma, X.-H. Wang, and L. Li, 'Identifying individuals with autism spectrum disorder based on the principal components of whole-brain phase synchrony', *Neurosci Lett*, vol. 742, p. 135519, Jan. 2021, doi: 10.1016/j.neulet.2020.135519.

- [0] J. Liu, Y. Sheng, W. Lan, R. Guo, Y. Wang, and J. Wang, 'Improved ASD classification using dynamic functional connectivity and multi-task feature selection', *Pattern Recognit Lett*, vol. 138, pp. 82–87, Oct. 2020, doi: 10.1016/j.patrec.2020.07.005.
- [1] A. S. Karampasi, A. D. Savva, V. Ch. Korfiatis, I. Kakkos, and G. K. Matsopoulos, 'Informative Biomarkers for Autism Spectrum Disorder Diagnosis in Functional Magnetic Resonance Imaging Data on the Default Mode Network', *Applied Sciences*, vol. 11, no. 13, p. 6216, Jul. 2021, doi: 10.3390/app11136216.
- [2] E. Jun, E. Kang, J. Choi, and H.-I. Suk, 'Modeling regional dynamics in low-frequency fluctuation and its application to Autism spectrum disorder diagnosis', *Neuroimage*, vol. 184, pp. 669–686, Jan. 2019, doi: 10.1016/j.neuroimage.2018.09.043.
- [3] G. Fan *et al.*, 'Abnormal Brain Regions in Two-Group Cross-Location Dynamics Model of Autism', *IEEE Access*, vol. 8, pp. 94526–94534, 2020, doi: 10.1109/ACCESS.2020.2995209.
- [4] M. A. Bayram, İ. Özer, and F. Temurtas, 'Deep Learning Methods for Autism Spectrum Disorder Diagnosis Based on fMRI Images', *Sakarya University Journal of Computer and Information Sciences*, vol. 4, no. 1, pp. 142–155, Apr. 2021, doi: 10.35377/saucis.04.01.879735.
- [5] Y. Liu, L. Xu, J. Yu, J. Li, and X. Yu, 'Identification of autism spectrum disorder using multi-regional resting-state data through an attention learning approach', *Biomed Signal Process Control*, vol. 69, p. 102833, Aug. 2021, doi: 10.1016/j.bspc.2021.102833.
- [6] P. S. Dammu and R. S. Bapi, 'Employing Temporal Properties of Brain Activity for Classifying Autism Using Machine Learning', in *Pattern Recognition and Machine Intelligence*, 2019, pp. 193–200. doi: 10.1007/978-3-030-34872-4\_22.
- [7] C.-Y. Wee, P.-T. Yap, and D. Shen, 'Diagnosis of Autism Spectrum Disorders Using Temporally Distinct Resting-State Functional Connectivity Networks', *CNS Neurosci Ther*, vol. 22, no. 3, pp. 212–219, Mar. 2016, doi: 10.1111/cns.12499.
- [8] M. A. Aghdam, A. Sharifi, and M. M. Pedram, 'Diagnosis of Autism Spectrum Disorders in Young Children Based on Resting-State Functional Magnetic Resonance Imaging Data Using Convolutional Neural Networks', *J Digit Imaging*, vol. 32, no. 6, pp. 899–918, Dec. 2019, doi: 10.1007/s10278-019-00196-1.
- [9] A. D. Savva, A. S. Karampasi, and G. K. Matsopoulos, 'Deriving resting-state fMRI biomarkers for classification of autism spectrum disorder', in *Autism 360°*, Elsevier, 2020, pp. 101–123. doi: 10.1016/B978-0-12-818466-0.00006-X.
- [0] N. C. Dvornek, P. Ventola, K. A. Pelphrey, and J. S. Duncan, *Machine Learning in Medical Imaging*, vol. 10541. Cham: Springer International Publishing, 2017. doi: 10.1007/978-3-319-67389-9.
- [1] R. Tejwani, A. Liska, H. You, J. Reinen, and P. Das, 'Autism Classification Using Brain Functional Connectivity Dynamics and Machine Learning', *arXiv preprint arXiv:1712.08041*, Dec. 2017.
- [2] M. D. Schirmer *et al.*, 'Neuropsychiatric disease classification using functional connectomics - results of the connectomics in neuroimaging transfer learning challenge', *Med Image Anal*, vol. 70, p. 101972, May 2021, doi: 10.1016/j.media.2021.101972.
- [3] L. Rabany *et al.*, 'Dynamic functional connectivity in schizophrenia and autism spectrum disorder: Convergence, divergence and classification', *Neuroimage Clin*, vol. 24, p. 101966, 2019, doi: 10.1016/j.nicl.2019.101966.
- [4] B. Huang, 'Diagnosis of autism spectrum disorder by causal influence strength learned from resting-state fMRI data', in *Neural Engineering Techniques for Autism Spectrum Disorder*, Elsevier, 2021, pp. 237–267. doi: 10.1016/B978-0-12-822822-7.00012-0.
- [5] H. Haghighat, M. Mirzarezaee, B. Nadjar Araabi, and A. Khadem, 'An age-dependent Connectivity-based computer aided diagnosis system for Autism Spectrum Disorder using Resting-state fMRI', *Biomed Signal Process Control*, vol. 71, p. 103108, Jan. 2022, doi: 10.1016/j.bspc.2021.103108.
- [6] M. S. Ahammed, S. Niu, M. R. Ahmed, J. Dong, X. Gao, and Y. Chen, 'DarkASDNet: Classification of ASD on Functional MRI Using Deep Neural Network', *Front Neuroinform*, vol. 15, p. 635657, Jun. 2021, doi: 10.3389/fninf.2021.635657.
- [7] M. S. Ahammed, S. Niu, M. R. Ahmed, J. Dong, X. Gao, and Y. Chen, 'Bag-of-Features Model for ASD fMRI Classification using SVM', in *2021 Asia-Pacific Conference on Communications Technology and Computer Science (ACCTCS)*, Jan. 2021, pp. 52–57. doi: 10.1109/ACCTCS52002.2021.00019.
- [8] Z. Xiao, J. Wu, C. Wang, N. Jia, and X. Yang, 'Computer-aided diagnosis of school-aged children with ASD using full frequency bands and enhanced SAE: A multi-institution study', *Exp Ther Med*, vol. 17, no. 5, pp. 4055–4063, Mar. 2019, doi: 10.3892/etm.2019.7448.

- [9] O. Dekhil *et al.*, 'Identifying Personalized Autism Related Impairments Using Resting Functional MRI and ADOS Reports', in *Medical Image Computing and Computer Assisted Intervention – MICCAI 2018*, 2018, pp. 240–248. doi: 10.1007/978-3-030-00931-1\_28.
- [10] S. Vigneshwaran, B. S. Mahanand, S. Suresh, and N. Sundararajan, 'Using regional homogeneity from functional MRI for diagnosis of ASD among males', in *2015 International Joint Conference on Neural Networks (IJCNN)*, Jul. 2015, pp. 1–8. doi: 10.1109/IJCNN.2015.7280562.
- [11] S. Rane, E. Jolly, A. Park, H. Jang, and C. Craddock, 'Developing predictive imaging biomarkers using whole-brain classifiers: Application to the ABIDE I dataset', *Res Ideas Outcomes*, vol. 3, p. e12733, Mar. 2017, doi: 10.3897/rio.3.e12733.
- [12] F. Zhao, H. Zhang, I. Rekik, Z. An, and D. Shen, 'Diagnosis of Autism Spectrum Disorders Using Multi-Level High-Order Functional Networks Derived From Resting-State Functional MRI', *Front Hum Neurosci*, vol. 12, p. 184, May 2018, doi: 10.3389/fnhum.2018.00184.
- [13] Y. Liang, B. Liu, and H. Zhang, 'A Convolutional Neural Network Combined With Prototype Learning Framework for Brain Functional Network Classification of Autism Spectrum Disorder', *IEEE Transactions on Neural Systems and Rehabilitation Engineering*, vol. 29, pp. 2193–2202, 2021, doi: 10.1109/TNSRE.2021.3120024.
- [14] J. Wang, Q. Wang, H. Zhang, J. Chen, S. Wang, and D. Shen, 'Sparse Multiview Task-Centralized Ensemble Learning for ASD Diagnosis Based on Age- and Sex-Related Functional Connectivity Patterns', *IEEE Trans Cybern*, vol. 49, no. 8, pp. 3141–3154, Aug. 2019, doi: 10.1109/TCYB.2018.2839693.
- [15] J. Wang, Q. Wang, S. Wang, and D. Shen, 'Sparse Multi-view Task-Centralized Learning for ASD Diagnosis', in *Mach Learn Med Imaging*, vol. 10541, 2017, pp. 159–167. doi: 10.1007/978-3-319-67389-9\_19.
- [16] S. Sartipi, M. G. Shayesteh, and H. Kalbkhani, 'Diagnosing of Autism Spectrum Disorder based on GARCH Variance Series for rs-fMRI data', in *2018 9th International Symposium on Telecommunications (IST)*, Dec. 2018, pp. 86–90. doi: 10.1109/ISTEL.2018.8661147.
- [17] A. Bernas, A. P. Aldenkamp, and S. Zinger, 'Wavelet coherence-based classifier: A resting-state functional MRI study on neurodynamics in adolescents with high-functioning autism', *Comput Methods Programs Biomed*, vol. 154, pp. 143–151, Feb. 2018, doi: 10.1016/j.cmpb.2017.11.017.
- [18] M. A. Syed, Z. Yang, X. P. Hu, and G. Deshpande, 'Investigating Brain Connectomic Alterations in Autism Using the Reproducibility of Independent Components Derived from Resting State Functional MRI Data', *Front Neurosci*, vol. 11, p. 459, Sep. 2017, doi: 10.3389/fnins.2017.00459.
- [19] L. Q. Uddin *et al.*, 'Salience Network–Based Classification and Prediction of Symptom Severity in Children With Autism', *JAMA Psychiatry*, vol. 70, no. 8, p. 869, Aug. 2013, doi: 10.1001/jamapsychiatry.2013.104.
- [20] M. Yang *et al.*, 'Large-Scale Brain Functional Network Integration for Discrimination of Autism Using a 3-D Deep Learning Model', *Front Hum Neurosci*, vol. 15, p. 687288, Jun. 2021, doi: 10.3389/fnhum.2021.687288.
- [21] S. Ghiassian, R. Greiner, P. Jin, and M. R. G. Brown, 'Using Functional or Structural Magnetic Resonance Images and Personal Characteristic Data to Identify ADHD and Autism', *PLoS One*, vol. 11, no. 12, p. e0166934, Dec. 2016, doi: 10.1371/journal.pone.0166934.
- [22] M. Khosla, K. Jamison, A. Kuceyeski, and M. R. Sabuncu, '3D Convolutional Neural Networks for Classification of Functional Connectomes', in *Deep Learning in Medical Image Analysis and Multimodal Learning for Clinical Decision Support*, Springer, 2018, pp. 137–145. doi: 10.1007/978-3-030-00889-5\_16.
- [23] A. Karampasi *et al.*, 'A Machine Learning fMRI Approach in the Diagnosis of Autism', in *2020 IEEE International Conference on Big Data (Big Data)*, Dec. 2020, pp. 3628–3631. doi: 10.1109/BigData50022.2020.9378453.
- [24] Y. You, H. Liu, S. Zhang, and L. Shao, 'Classification of Autism Based on fMRI Data with Feature-Fused Convolutional Neural Network', in *Cyberspace Data and Intelligence, and Cyber-Living, Syndrome, and Health*, 2020, pp. 77–88. doi: 10.1007/978-981-33-4336-8\_7.
- [25] A. Rathore, S. Palande, J. S. Anderson, B. A. Zielinski, P. T. Fletcher, and B. Wang, 'Autism Classification Using Topological Features and Deep Learning: A Cautionary Tale', in *Med Image Comput Assist Interv*, vol. 11766, 2019, pp. 736–744. doi: 10.1007/978-3-030-32248-9\_82.
- [26] A. Sadiq, M. I. Al-Hiyali, N. Yahya, T. B. Tang, and D. M. Khan, 'Non-Oscillatory Connectivity Approach for Classification of Autism Spectrum Disorder Subtypes Using Resting-State fMRI', *IEEE Access*, vol. 10, pp. 14049–14061, 2022, doi: 10.1109/ACCESS.2022.3146719.

- 17] R. M. Thomas, S. Gallo, L. Cerliani, P. Zhutovsky, A. El-Gazzar, and G. van Wingen, 'Classifying Autism Spectrum Disorder Using the Temporal Statistics of Resting-State Functional MRI Data With 3D Convolutional Neural Networks', *Front Psychiatry*, vol. 11, p. 440, May 2020, doi: 10.3389/fpsyt.2020.00440.
- 18] L. Herath, D. Meedeniya, M. A. J. C. Marasingha, and V. Weerasinghe, 'Autism spectrum disorder diagnosis support model using Inception V3', in *2021 International Research Conference on Smart Computing and Systems Engineering (SCSE)*, Sep. 2021, vol. 4, pp. 1–7. doi: 10.1109/SCSE53661.2021.9568314.
- 19] M. R. Ahmed, Y. Zhang, Y. Liu, and H. Liao, 'Single Volume Image Generator and Deep Learning-Based ASD Classification', *IEEE J Biomed Health Inform*, vol. 24, no. 11, pp. 3044–3054, Nov. 2020, doi: 10.1109/JBHI.2020.2998603.
- 10] N. Dominic, T. W. Cenggoro, A. Budiarto, and B. Pardamean, 'Transfer learning using inception-ResNet-v2 model to the augmented neuroimages data for autism spectrum disorder classification', *Communications in Mathematical Biology and Neuroscience*, vol. 2021, p. Article ID 39, 2021, doi: 10.28919/cmbn/5565.
- 11] N. Adluru *et al.*, 'Classification in DTI using shapes of white matter tracts', in *2009 Annual International Conference of the IEEE Engineering in Medicine and Biology Society*, Sep. 2009, pp. 2719–2722. doi: 10.1109/IEMBS.2009.5333386.
- 12] Z. Zhang and W. Zheng, 'The Discriminative Power of White Matter Microstructures for Autism Diagnosis', *IFAC-PapersOnLine*, vol. 53, no. 5, pp. 446–451, 2020, doi: 10.1016/j.ifacol.2021.04.121.
- 13] F. Zhang *et al.*, 'Fiber clustering based white matter connectivity analysis for prediction of Autism Spectrum Disorder using diffusion tensor imaging', in *2016 IEEE 13th International Symposium on Biomedical Imaging (ISBI)*, Apr. 2016, pp. 564–567. doi: 10.1109/ISBI.2016.7493331.
- 14] M. Ingalhalikar, D. Parker, L. Bloy, T. P. L. Roberts, and R. Verma, 'Diffusion based abnormality markers of pathology: Toward learned diagnostic prediction of ASD', *Neuroimage*, vol. 57, no. 3, pp. 918–927, Aug. 2011, doi: 10.1016/j.neuroimage.2011.05.023.
- 15] F. Zhang *et al.*, 'Whole brain white matter connectivity analysis using machine learning: An application to autism', *Neuroimage*, vol. 172, pp. 826–837, May 2018, doi: 10.1016/j.neuroimage.2017.10.029.
- 16] M. Mostapha, M. F. Casanova, G. Gimel'farb, and A. El-Baz, 'Towards Non-invasive Image-Based Early Diagnosis of Autism', in *Medical Image Computing and Computer-Assisted Intervention – MICCAI 2015*, 2015, pp. 160–168. doi: 10.1007/978-3-319-24571-3\_20.
- 17] Y. Elnakieb *et al.*, 'The Role of Diffusion Tensor MR Imaging (DTI) of the Brain in Diagnosing Autism Spectrum Disorder: Promising Results', *Sensors*, vol. 21, no. 24, p. 8171, Dec. 2021, doi: 10.3390/s21248171.
- 18] N. Lange *et al.*, 'Atypical diffusion tensor hemispheric asymmetry in autism', *Autism Research*, vol. 3, no. 6, pp. 350–358, Dec. 2010, doi: 10.1002/aur.162.
- 19] Y. A. Elnakieb *et al.*, 'Computer Aided Autism Diagnosis Using Diffusion Tensor Imaging', *IEEE Access*, vol. 8, pp. 191298–191308, 2020, doi: 10.1109/ACCESS.2020.3032066.
- 20] J. Kang, Y. Jin, G. Liang, and X. Li, 'Accurate assessment of low-function autistic children based on EEG feature fusion', *Journal of Clinical Neuroscience*, vol. 90, pp. 351–358, Aug. 2021, doi: 10.1016/j.jocn.2021.06.022.
- 1.] E. Grossi, C. Olivieri, and M. Buscema, 'Diagnosis of autism through EEG processed by advanced computational algorithms: A pilot study', *Comput Methods Programs Biomed*, vol. 142, pp. 73–79, Apr. 2017, doi: 10.1016/j.cmpb.2017.02.002.
- 2.] M. Ahmadlou, H. Adeli, and A. Adeli, 'Fuzzy Synchronization Likelihood-wavelet methodology for diagnosis of autism spectrum disorder', *J Neurosci Methods*, vol. 211, no. 2, pp. 203–209, Nov. 2012, doi: 10.1016/j.jneumeth.2012.08.020.
- 3.] H. Behnam, A. Sheikhan, M. R. Mohammadi, M. Noroozian, and P. Golabi, 'Abnormalities in Connectivity of Quantitative Electroencephalogram Background Activity in Autism Disorders especially in Left Hemisphere and Right Temporal', in *Tenth International Conference on Computer Modeling and Simulation (uksim 2008)*, Apr. 2008, pp. 82–87. doi: 10.1109/UKSIM.2008.68.
- 4.] W. Jamal, S. Das, I.-A. Oprescu, K. Maharatna, F. Apicella, and F. Sicca, 'Classification of autism spectrum disorder using supervised learning of brain connectivity measures extracted from synchrostates', *J Neural Eng*, vol. 11, no. 4, p. 046019, Aug. 2014, doi: 10.1088/1741-2560/11/4/046019.
- 5.] T. Wadhera and D. Kakkar, 'Social cognition and functional brain network in autism spectrum disorder: Insights from EEG graph-theoretic measures', *Biomed Signal Process Control*, vol. 67, p. 102556, May 2021, doi: 10.1016/j.bspc.2021.102556.



- .6] F. H. Duffy and H. Als, 'A stable pattern of EEG spectral coherence distinguishes children with autism from neuro-typical controls - a large case control study', *BMC Med*, vol. 10, no. 1, p. 64, Dec. 2012, doi: 10.1186/1741-7015-10-64.
- .7] G. S. Bajestani, M. Behrooz, A. G. Khani, M. Nouri-Baygi, and A. Mollaei, 'Diagnosis of autism spectrum disorder based on complex network features', *Comput Methods Programs Biomed*, vol. 177, pp. 277–283, Aug. 2019, doi: 10.1016/j.cmpb.2019.06.006.
- .8] N. Satheesh Kumar, J. Mohanalin, and J. Mahil, 'Recognition of autism in children via electroencephalogram behaviour using particle swarm optimization based ANFIS classifier', *Multimed Tools Appl*, vol. 79, no. 13–14, pp. 8747–8766, Apr. 2020, doi: 10.1007/s11042-018-6290-0.
- .9] D. Abdolzadegan, M. H. Moattar, and M. Ghoshuni, 'A robust method for early diagnosis of autism spectrum disorder from EEG signals based on feature selection and DBSCAN method', *Biocybern Biomed Eng*, vol. 40, no. 1, pp. 482–493, Jan. 2020, doi: 10.1016/j.bbe.2020.01.008.
- .0] W. J. Bosl, T. Loddenkemper, and C. A. Nelson, 'Nonlinear EEG biomarker profiles for autism and absence epilepsy', *Neuropsychiatr Electrophysiol*, vol. 3, no. 1, p. 1, Dec. 2017, doi: 10.1186/s40810-017-0023-x.
- .1] T. Heunis *et al.*, 'Recurrence quantification analysis of resting state EEG signals in autism spectrum disorder – a systematic methodological exploration of technical and demographic confounders in the search for biomarkers', *BMC Med*, vol. 16, no. 1, p. 101, Dec. 2018, doi: 10.1186/s12916-018-1086-7.
- .2] T. A. Manoharan and M. Radhakrishnan, 'Region-Wise Brain Response Classification of ASD Children Using EEG and BiLSTM RNN', *Clin EEG Neurosci*, p. 155005942110549, Nov. 2021, doi: 10.1177/15500594211054990.
- .3] W. J. Bosl, H. Tager-Flusberg, and C. A. Nelson, 'EEG Analytics for Early Detection of Autism Spectrum Disorder: A data-driven approach', *Sci Rep*, vol. 8, no. 1, p. 6828, Dec. 2018, doi: 10.1038/s41598-018-24318-x.
- .4] S. Ibrahim, R. Djemal, and A. Alsuwailem, 'Electroencephalography (EEG) signal processing for epilepsy and autism spectrum disorder diagnosis', *Biocybern Biomed Eng*, vol. 38, no. 1, pp. 16–26, 2018, doi: 10.1016/j.bbe.2017.08.006.
- .5] J. Castelhana, P. Tavares, S. Mouga, G. Oliveira, and M. Castelo-Branco, 'Stimulus dependent neural oscillatory patterns show reliable statistical identification of autism spectrum disorder in a face perceptual decision task', *Clinical Neurophysiology*, vol. 129, no. 5, pp. 981–989, May 2018, doi: 10.1016/j.clinph.2018.01.072.
- .6] A. K. Subudhi, M. Mohanty, S. K. Sahoo, S. K. Mohanty, and B. Mohanty, 'Automated Delimitation and Classification of Autistic Disorder Using EEG Signal', *IETE J Res*, pp. 1–9, Nov. 2020, doi: 10.1080/03772063.2020.1844076.
- .7] J. Eldridge, A. E. Lane, M. Belkin, and S. Dennis, 'Robust features for the automatic identification of autism spectrum disorder in children', *J Neurodev Disord*, vol. 6, no. 1, p. 12, Dec. 2014, doi: 10.1186/1866-1955-6-12.
- .8] A. Gui *et al.*, 'Attentive brain states in infants with and without later autism', *Transl Psychiatry*, vol. 11, no. 1, p. 196, Dec. 2021, doi: 10.1038/s41398-021-01315-9.
- .9] E. Askari, S. K. Setarehdan, A. Sheikhani, M. R. Mohammadi, and M. Teshnehlab, 'Computational model for detection of abnormal brain connections in children with autism', *J Integr Neurosci*, vol. 17, no. 3, pp. 237–248, Aug. 2018, doi: 10.31083/JIN-180075.
- .0] R. Djemal, K. AlSharabi, S. Ibrahim, and A. Alsuwailem, 'EEG-Based Computer Aided Diagnosis of Autism Spectrum Disorder Using Wavelet, Entropy, and ANN', *Biomed Res Int*, vol. 2017, pp. 1–9, 2017, doi: 10.1155/2017/9816591.
- .1] T.-H. Pham *et al.*, 'Autism Spectrum Disorder Diagnostic System Using HOS Bispectrum with EEG Signals', *Int J Environ Res Public Health*, vol. 17, no. 3, p. 971, Feb. 2020, doi: 10.3390/ijerph17030971.
- .2] F. Salehi, M. Jaloli, R. Coben, and A. M. Nasrabadi, 'Estimating brain effective connectivity from EEG signals of patients with autism disorder and healthy individuals by reducing volume conduction effect', *Cogn Neurodyn*, vol. 16, no. 3, pp. 519–529, Jun. 2022, doi: 10.1007/s11571-021-09730-w.
- .3] F. A. Alturki, K. AlSharabi, A. M. Abdurraqueeb, and M. Aljalal, 'EEG Signal Analysis for Diagnosing Neurological Disorders Using Discrete Wavelet Transform and Intelligent Techniques', *Sensors*, vol. 20, no. 9, p. 2505, Apr. 2020, doi: 10.3390/s20092505.

- [4] X. Li, E. Cai, L. Qin, and J. Kang, '[Abnormal electroencephalogram features extraction of autistic children based on wavelet transform combined with empirical modal decomposition].', *Sheng Wu Yi Xue Gong Cheng Xue Za Zhi*, vol. 35, no. 4, pp. 524–529, 2018, doi: 10.7507/1001-5515.201705067.
- [5] E. Askari, S. K. Setarehdan, A. Sheikhani, M. R. Mohammadi, and M. Teshnehlab, 'Modeling the connections of brain regions in children with autism using cellular neural networks and electroencephalography analysis', *Artif Intell Med*, vol. 89, pp. 40–50, Jul. 2018, doi: 10.1016/j.artmed.2018.05.003.
- [6] Y. Jayawardana, M. Jaime, and S. Jayarathna, 'Analysis of Temporal Relationships between ASD and Brain Activity through EEG and Machine Learning', in *2019 IEEE 20th International Conference on Information Reuse and Integration for Data Science (IRI)*, Jul. 2019, pp. 151–158. doi: 10.1109/IRI.2019.00035.
- [7] M. Baygin *et al.*, 'Automated ASD detection using hybrid deep lightweight features extracted from EEG signals', *Comput Biol Med*, vol. 134, p. 104548, Jul. 2021, doi: 10.1016/j.combiomed.2021.104548.
- [8] A. Sheikhani, H. Behnam, M. Noroozian, M. R. Mohammadi, and M. Mohammadi, 'Abnormalities of quantitative electroencephalography in children with Asperger disorder in various conditions', *Res Autism Spectr Disord*, vol. 3, no. 2, pp. 538–546, Apr. 2009, doi: 10.1016/j.rasd.2008.11.002.
- [9] M. N. A. Tawhid, S. Siuly, and H. Wang, 'Diagnosis of autism spectrum disorder from EEG using a time–frequency spectrogram image-based approach', *Electron Lett*, vol. 56, no. 25, pp. 1372–1375, Dec. 2020, doi: 10.1049/el.2020.2646.
- [10] E. Abdulhay *et al.*, 'Computer-aided autism diagnosis via second-order difference plot area applied to EEG empirical mode decomposition', *Neural Comput Appl*, vol. 32, no. 15, pp. 10947–10956, Aug. 2020, doi: 10.1007/s00521-018-3738-0.
- [11] D. Haputhanthri *et al.*, 'An EEG based Channel Optimized Classification Approach for Autism Spectrum Disorder', in *2019 Moratuwa Engineering Research Conference (MERCon)*, Jul. 2019, pp. 123–128. doi: 10.1109/MERCon.2019.8818814.
- [12] M. I. Kamel *et al.*, 'EEG based Autism Diagnosis Using Regularized Fisher Linear Discriminant Analysis', *International Journal of Image, Graphics and Signal Processing*, vol. 4, no. 3, pp. 35–41, Apr. 2012, doi: 10.5815/ijigsp.2012.03.06.
- [13] W. Khazaal Shams and A. W. Abdul Rahman, 'Characterizing autistic disorder based on Principle Component Analysis', in *2011 IEEE Symposium on Industrial Electronics and Applications*, Sep. 2011, pp. 653–657. doi: 10.1109/ISIEA.2011.6108797.
- [14] E. A. Alsaggaf and M. I. Kamel, 'Using EEGs to diagnose autism disorder by classification algorithm', *Life Sci J*, vol. 11, no. 6, pp. 305–308, 2014, doi: 10.7537/marslsj110614.40.
- [15] N. Razali and A. Wahab, '2D affective space model (ASM) for detecting autistic children', in *2011 IEEE 15th International Symposium on Consumer Electronics (ISCE)*, Jun. 2011, pp. 536–541. doi: 10.1109/ISCE.2011.5973888.
- [16] A. Salekin and N. Russo, 'Understanding autism', in *Proceedings of the Workshop on Medical Cyber Physical Systems and Internet of Medical Things*, May 2021, pp. 12–16. doi: 10.1145/3446913.3460317.
- [17] M. Radhakrishnan, K. Ramamurthy, K. K. Choudhury, D. Won, and T. A. Manoharan, 'Performance Analysis of Deep Learning Models for Detection of Autism Spectrum Disorder from EEG Signals', *Traitement du Signal*, vol. 38, no. 3, pp. 853–863, Jun. 2021, doi: 10.18280/ts.380332.
- [18] A. Sheikhani, H. Behnam, M. R. Mohammadi, M. Noroozian, and P. Golabi, 'Analysis of quantitative Electroencephalogram background activity in Autism disease patients with Lempel-Ziv complexity and Short Time Fourier Transform measure', in *2007 4th IEEE/EMBS International Summer School and Symposium on Medical Devices and Biosensors*, Aug. 2007, pp. 111–114. doi: 10.1109/ISSMDBS.2007.4338305.
- [19] Q. Mohi-Ud-Din and A. K. Jayanthi, 'EEG feature extraction using wavelet transform for classifying autism spectrum disorder', *Mater Today Proc*, Mar. 2021, doi: 10.1016/j.matpr.2021.01.803.
- [20] J. Zhao, J. Song, X. Li, and J. Kang, 'A study on EEG feature extraction and classification in autistic children based on singular spectrum analysis method', *Brain Behav*, vol. 10, no. 12, p. e01721, Dec. 2020, doi: 10.1002/brb3.1721.
- [21] M. Ranjani and P. Supraja, 'Classifying the Autism and Epilepsy Disorder Based on EEG Signal Using Deep Convolutional Neural Network (DCNN)', in *2021 International Conference on Advance Computing and Innovative Technologies in Engineering (ICACITE)*, Mar. 2021, pp. 880–886. doi: 10.1109/ICACITE51222.2021.9404634.

- [2] A. R. Aslam, N. Hafeez, H. Heidari, and M. A. Bin Altaf, 'An 8.62  $\mu$  W Processor for Autism Spectrum Disorder Classification using Shallow Neural Network', in *2021 IEEE 3rd International Conference on Artificial Intelligence Circuits and Systems (AICAS)*, Jun. 2021, pp. 1–4. doi: 10.1109/AICAS51828.2021.9458412.
- [3] N. Ghoreishi, A. Goshvarpour, S. Zare-Molekabad, N. Khorshidi, and S. Baratzade, 'Classification of autistic children using polar-based lagged state-space indices of EEG signals', *Signal Image Video Process*, vol. 15, no. 8, pp. 1805–1812, Nov. 2021, doi: 10.1007/s11760-021-01928-z.
- [4] G. Bouallegue, R. Djemal, S. A. Alshebeili, and H. Aldhalaan, 'A Dynamic Filtering DF-RNN Deep-Learning-Based Approach for EEG-Based Neurological Disorders Diagnosis', *IEEE Access*, vol. 8, pp. 206992–207007, 2020, doi: 10.1109/ACCESS.2020.3037995.
- [5] N. A. Ali, 'Autism spectrum disorder classification on electroencephalogram signal using deep learning algorithm', *IAES International Journal of Artificial Intelligence (IJ-AI)*, vol. 9, no. 1, p. 91, Mar. 2020, doi: 10.11591/ijai.v9.i1.pp91-99.
- [6] M. Ahmadlou, H. Adeli, and A. Adeli, 'Fractality and a Wavelet-Chaos-Neural Network Methodology for EEG-Based Diagnosis of Autistic Spectrum Disorder', *Journal of Clinical Neurophysiology*, vol. 27, no. 5, pp. 328–333, Oct. 2010, doi: 10.1097/WNP.0b013e3181f40dc8.
- [7] A. Sheikhan, H. Behnam, M. R. Mohammadi, M. Noroozian, and M. Mohammadi, 'Detection of Abnormalities for Diagnosing of Children with Autism Disorders Using of Quantitative Electroencephalography Analysis', *J Med Syst*, vol. 36, no. 2, pp. 957–963, Apr. 2012, doi: 10.1007/s10916-010-9560-6.
- [8] D. Alie, M. H. Mahoor, W. I. Mattson, D. R. Anderson, and D. S. Messinger, 'Analysis of eye gaze pattern of infants at risk of autism spectrum disorder using Markov models', in *2011 IEEE Workshop on Applications of Computer Vision (WACV)*, Jan. 2011, pp. 282–287. doi: 10.1109/WACV.2011.5711515.
- [9] S. Ozdemir, I. Akin-Bulbul, I. Kok, and S. Ozdemir, 'Development of a visual attention based decision support system for autism spectrum disorder screening', *International Journal of Psychophysiology*, vol. 173, pp. 69–81, Mar. 2022, doi: 10.1016/j.ijpsycho.2022.01.004.
- [10] R. Carette, F. Cilia, G. Dequen, J. Bosche, J.-L. Guerin, and L. Vandromme, 'Automatic Autism Spectrum Disorder Detection Thanks to Eye-Tracking and Neural Network-Based Approach', in *Internet of Things (IoT) Technologies for HealthCare*, 2018, pp. 75–81. doi: 10.1007/978-3-319-76213-5\_11.
- [11] R. Carette, M. Elbattah, F. Cilia, G. Dequen, J.-L. Guérin, and J. Bosche, 'Learning to Predict Autism Spectrum Disorder based on the Visual Patterns of Eye-tracking Scanpaths', in *Proceedings of the 12th International Joint Conference on Biomedical Engineering Systems and Technologies*, 2019, pp. 103–112. doi: 10.5220/0007402601030112.
- [12] J. S. Oliveira *et al.*, 'Computer-aided autism diagnosis based on visual attention models using eye tracking', *Sci Rep*, vol. 11, no. 1, p. 10131, Dec. 2021, doi: 10.1038/s41598-021-89023-8.
- [13] E. Khalaji, 'A machine learning approach for detecting high-functioning autism using web-based eye-tracking data', Middle East Technical University, Ankara, 2021.
- [14] V. Yaneva, L. A. Ha, S. Eraslan, Y. Yesilada, and R. Mitkov, 'Detecting Autism Based on Eye-Tracking Data from Web Searching Tasks', in *Proceedings of the 15th International Web for All Conference*, Apr. 2018, pp. 1–10. doi: 10.1145/3192714.3192819.
- [15] V. Yaneva, L. A. Ha, S. Eraslan, Y. Yesilada, and R. Mitkov, 'Detecting High-Functioning Autism in Adults Using Eye Tracking and Machine Learning', *IEEE Transactions on Neural Systems and Rehabilitation Engineering*, vol. 28, no. 6, pp. 1254–1261, Jun. 2020, doi: 10.1109/TNSRE.2020.2991675.
- [16] S. Eraslan, Y. Yesilada, V. Yaneva, and S. Harper, 'Autism detection based on eye movement sequences on the web', in *Proceedings of the 17th International Web for All Conference*, Apr. 2020, pp. 1–10. doi: 10.1145/3371300.3383340.
- [17] M. Jiang and Q. Zhao, 'Learning Visual Attention to Identify People with Autism Spectrum Disorder', in *2017 IEEE International Conference on Computer Vision (ICCV)*, Oct. 2017, pp. 3287–3296. doi: 10.1109/ICCV.2017.354.
- [18] G. Arru, P. Mazumdar, and F. Battisti, 'Exploiting Visual Behaviour for Autism Spectrum Disorder Identification', in *2019 IEEE International Conference on Multimedia & Expo Workshops (ICMEW)*, Jul. 2019, pp. 637–640. doi: 10.1109/ICMEW.2019.00123.
- [19] S. Rahman, S. Rahman, O. Shahid, Md. T. Abdullah, and J. A. Sourov, 'Classifying Eye-Tracking Data Using Saliency Maps', in *2020 25th International Conference on Pattern Recognition (ICPR)*, Jan. 2021, pp. 9288–9295. doi: 10.1109/ICPR48806.2021.9412308.
- [20] S. Chen and Q. Zhao, 'Attention-Based Autism Spectrum Disorder Screening With Privileged Modality', in *2019 IEEE/CVF International Conference on Computer Vision (ICCV)*, Oct. 2019, pp. 1181–1190. doi: 10.1109/ICCV.2019.00127.

- '1] G. Wan *et al.*, 'Applying Eye Tracking to Identify Autism Spectrum Disorder in Children', *J Autism Dev Disord*, vol. 49, no. 1, pp. 209–215, Jan. 2019, doi: 10.1007/s10803-018-3690-y.
- '2] S. Liaqat *et al.*, 'Predicting ASD diagnosis in children with synthetic and image-based eye gaze data', *Signal Process Image Commun*, vol. 94, p. 116198, May 2021, doi: 10.1016/j.image.2021.116198.
- '3] M. Alcañiz *et al.*, 'Eye gaze as a biomarker in the recognition of autism spectrum disorder using virtual reality and machine learning: A proof of concept for diagnosis', *Autism Research*, vol. 15, no. 1, pp. 131–145, Jan. 2022, doi: 10.1002/aur.2636.
- '4] Y. Lin, Y. Gu, Y. Xu, S. Hou, R. Ding, and S. Ni, 'Autistic spectrum traits detection and early screening: A machine learning based eye movement study', *Journal of Child and Adolescent Psychiatric Nursing*, vol. 35, no. 1, pp. 83–92, Feb. 2022, doi: 10.1111/jcap.12346.
- '5] W. Liu, M. Li, and L. Yi, 'Identifying children with autism spectrum disorder based on their face processing abnormality: A machine learning framework', *Autism Research*, vol. 9, no. 8, pp. 888–898, Aug. 2016, doi: 10.1002/aur.1615.
- '6] W. Liu, X. Yu, B. Raj, L. Yi, X. Zou, and M. Li, 'Efficient autism spectrum disorder prediction with eye movement: A machine learning framework', in *2015 International Conference on Affective Computing and Intelligent Interaction (ACII)*, Sep. 2015, pp. 649–655. doi: 10.1109/ACII.2015.7344638.
- '7] J. Kang, X. Han, J.-F. Hu, H. Feng, and X. Li, 'The study of the differences between low-functioning autistic children and typically developing children in the processing of the own-race and other-race faces by the machine learning approach', *Journal of Clinical Neuroscience*, vol. 81, pp. 54–60, Nov. 2020, doi: 10.1016/j.jocn.2020.09.039.
- '8] Z. Zhao, H. Tang, X. Zhang, X. Qu, X. Hu, and J. Lu, 'Classification of Children With Autism and Typical Development Using Eye-Tracking Data From Face-to-Face Conversations: Machine Learning Model Development and Performance Evaluation', *J Med Internet Res*, vol. 23, no. 8, p. e29328, Aug. 2021, doi: 10.2196/29328.
- '9] A. Lu and M. Perkowski, 'Deep Learning Approach for Screening Autism Spectrum Disorder in Children with Facial Images and Analysis of Ethnoracial Factors in Model Development and Application', *Brain Sci*, vol. 11, no. 11, p. 1446, Oct. 2021, doi: 10.3390/brainsci11111446.
- '0] M. Beary, A. Hadsell, R. Messersmith, and M.-P. Hosseini, 'Diagnosis of Autism in Children using Facial Analysis and Deep Learning', *arXiv preprint arXiv:2008.02890*, Aug. 2020.
- '1] P. V. K. Sandeep and N. S. Kumar, 'Autism Detection in Children with Facial Cues using Dense Net Deep Learning Architecture', *Design Engineering*, vol. 2021, no. 9, pp. 7506–7520, 2021.
- '2] S. Ram Arumugam, S. Ganesh Karuppasamy, S. Gowr, O. Manoj, and K. Kalaivani, 'A Deep Convolutional Neural Network based Detection System for Autism Spectrum Disorder in Facial images', in *2021 Fifth International Conference on I-SMAC (IoT in Social, Mobile, Analytics and Cloud) (I-SMAC)*, Nov. 2021, pp. 1255–1259. doi: 10.1109/I-SMAC52330.2021.9641046.
- '3] S. R. Arumugam, R. Balakrishna, R. Khilar, O. Manoj, and C. S. Shylaja, 'Prediction of Autism Spectrum Disorder in Children using Face Recognition', in *2021 2nd International Conference on Smart Electronics and Communication (ICOSEC)*, Oct. 2021, pp. 1246–1250. doi: 10.1109/ICOSEC51865.2021.9591679.
- '4] T. Akter *et al.*, 'Improved Transfer-Learning-Based Facial Recognition Framework to Detect Autistic Children at an Early Stage', *Brain Sci*, vol. 11, no. 6, p. 734, May 2021, doi: 10.3390/brainsci11060734.
- '5] K. K. Mujeeb Rahman and M. M. Subashini, 'Identification of Autism in Children Using Static Facial Features and Deep Neural Networks', *Brain Sci*, vol. 12, no. 1, p. 94, Jan. 2022, doi: 10.3390/brainsci12010094.
- '6] Y. Khosla, P. Ramachandra, and N. Chaitra, 'Detection of autistic individuals using facial images and deep learning', in *2021 IEEE International Conference on Computation System and Information Technology for Sustainable Solutions (CSITSS)*, Dec. 2021, pp. 1–5. doi: 10.1109/CSITSS54238.2021.9683205.
- '7] R. Sadik, S. Anwar, and M. L. Reza, 'AutismNet: Recognition of Autism Spectrum Disorder from Facial Expressions using MobileNet Architecture', *International Journal of Advanced Trends in Computer Science and Engineering*, vol. 10, no. 1, pp. 327–334, Feb. 2021, doi: 10.30534/ijatcse/2021/471012021.
- '8] B. Banire, D. Al Thani, M. Qaraq, and B. Mansoor, 'Face-Based Attention Recognition Model for Children with Autism Spectrum Disorder', *J Healthc Inform Res*, vol. 5, no. 4, pp. 420–445, Dec. 2021, doi: 10.1007/s41666-021-00101-y.
- '9] B. Li *et al.*, 'A Facial Affect Analysis System for Autism Spectrum Disorder', in *2019 IEEE International Conference on Image Processing (ICIP)*, Sep. 2019, pp. 4549–4553. doi: 10.1109/ICIP.2019.8803604.

- 10] D.-Y. Song, C.-C. Topriceanu, D. C. Ilie-Ablachim, M. Kinali, and S. Bisdas, 'Machine learning with neuroimaging data to identify autism spectrum disorder: a systematic review and meta-analysis', *Neuroradiology*, vol. 63, no. 12, pp. 2057–2072, Dec. 2021, doi: 10.1007/s00234-021-02774-z.
- 11] K. Gao, Y. Sun, S. Niu, and L. Wang, 'Unified framework for early stage status prediction of autism based on infant structural magnetic resonance imaging', *Autism Research*, vol. 14, no. 12, pp. 2512–2523, Dec. 2021, doi: 10.1002/aur.2626.
- 12] L. Q. Uddin *et al.*, 'Multivariate Searchlight Classification of Structural Magnetic Resonance Imaging in Children and Adolescents with Autism', *Biol Psychiatry*, vol. 70, no. 9, pp. 833–841, Nov. 2011, doi: 10.1016/j.biopsych.2011.07.014.
- 13] Y. Kong, J. Gao, Y. Xu, Y. Pan, J. Wang, and J. Liu, 'Classification of autism spectrum disorder by combining brain connectivity and deep neural network classifier', *Neurocomputing*, vol. 324, pp. 63–68, Jan. 2019, doi: 10.1016/j.neucom.2018.04.080.
- 14] J. M. Górriz *et al.*, 'A Machine Learning Approach to Reveal the NeuroPhenotypes of Autisms', *Int J Neural Syst*, vol. 29, no. 07, p. 1850058, Sep. 2019, doi: 10.1142/S0129065718500582.
- 15] W. Sato *et al.*, 'Reduced Gray Matter Volume in the Social Brain Network in Adults with Autism Spectrum Disorder', *Front Hum Neurosci*, vol. 11, p. 395, Aug. 2017, doi: 10.3389/fnhum.2017.00395.
- 16] F. Segovia *et al.*, 'Identifying endophenotypes of autism: a multivariate approach', *Front Comput Neurosci*, vol. 8, p. 60, Jun. 2014, doi: 10.3389/fncom.2014.00060.
- 17] C. Ecker *et al.*, 'Investigating the predictive value of whole-brain structural MR scans in autism: A pattern classification approach', *Neuroimage*, vol. 49, no. 1, pp. 44–56, Jan. 2010, doi: 10.1016/j.neuroimage.2009.08.024.
- 18] L. Wang, C.-Y. Wee, X. Tang, P.-T. Yap, and D. Shen, 'Multi-task feature selection via supervised canonical graph matching for diagnosis of autism spectrum disorder', *Brain Imaging Behav*, vol. 10, no. 1, pp. 33–40, Mar. 2016, doi: 10.1007/s11682-015-9360-1.
- 19] N. Denier, G. Steinberg, L. T. Elst, and T. Bracht, 'The role of head circumference and cerebral volumes to phenotype male adults with autism spectrum disorder', *Brain Behav*, vol. 12, no. 3, p. e2460, Mar. 2022, doi: 10.1002/brb3.2460.
- 20] S. Vigneshwaran, B. S. Mahanand, S. Suresh, and R. Savitha, 'Autism spectrum disorder detection using projection based learning meta-cognitive RBF network', in *The 2013 International Joint Conference on Neural Networks (IJCNN)*, Aug. 2013, pp. 1–8. doi: 10.1109/IJCNN.2013.6706777.
- 21] M. J. Leming, S. Baron-Cohen, and J. Suckling, 'Single-participant structural similarity matrices lead to greater accuracy in classification of participants than function in autism in MRI', *Mol Autism*, vol. 12, no. 1, p. 34, Dec. 2021, doi: 10.1186/s13229-021-00439-5.
- 22] Z. Fan, J. Su, K. Gao, D. Hu, and L.-L. Zeng, 'A Federated Deep Learning Framework for 3D Brain MRI Images', in *2021 International Joint Conference on Neural Networks (IJCNN)*, Jul. 2021, pp. 1–6. doi: 10.1109/IJCNN52387.2021.9534376.
- 23] V. Subbaraju, S. Sundaram, S. Narasimhan, and M. B. Suresh, 'Accurate detection of autism spectrum disorder from structural MRI using extended metacognitive radial basis function network', *Expert Syst Appl*, vol. 42, no. 22, pp. 8775–8790, Dec. 2015, doi: 10.1016/j.eswa.2015.07.031.
- 24] S. Calderoni, A. Retico, L. Biagi, R. Tancredi, F. Muratori, and M. Tosetti, 'Female children with autism spectrum disorder: An insight from mass-univariate and pattern classification analyses', *Neuroimage*, vol. 59, no. 2, pp. 1013–1022, Jan. 2012, doi: 10.1016/j.neuroimage.2011.08.070.
- 25] Y. Fu *et al.*, 'A novel pipeline leveraging surface-based features of small subcortical structures to classify individuals with autism spectrum disorder', *Prog Neuropsychopharmacol Biol Psychiatry*, vol. 104, p. 109989, Jan. 2021, doi: 10.1016/j.pnpbp.2020.109989.
- 26] I. Bilgen, G. Guvercin, and I. Rekek, 'Machine learning methods for brain network classification: Application to autism diagnosis using cortical morphological networks', *J Neurosci Methods*, vol. 343, p. 108799, Sep. 2020, doi: 10.1016/j.jneumeth.2020.108799.
- 27] O. Graa and I. Rekek, 'Multi-view learning-based data proliferator for boosting classification using highly imbalanced classes', *J Neurosci Methods*, vol. 327, p. 108344, Nov. 2019, doi: 10.1016/j.jneumeth.2019.108344.
- 28] C. Ecker *et al.*, 'Describing the Brain in Autism in Five Dimensions--Magnetic Resonance Imaging-Assisted Diagnosis of Autism Spectrum Disorder Using a Multiparameter Classification Approach', *Journal of Neuroscience*, vol. 30, no. 32, pp. 10612–10623, Aug. 2010, doi: 10.1523/JNEUROSCI.5413-09.2010.

- 19] Y. Jiao, R. Chen, X. Ke, K. Chu, Z. Lu, and E. H. Herskovits, 'Predictive models of autism spectrum disorder based on brain regional cortical thickness', *Neuroimage*, vol. 50, no. 2, pp. 589–599, Apr. 2010, doi: 10.1016/j.neuroimage.2009.12.047.
- 20] L. Squarcina *et al.*, 'Automatic classification of autism spectrum disorder in children using cortical thickness and support vector machine', *Brain Behav*, vol. 11, no. 8, p. e2238, Aug. 2021, doi: 10.1002/brb3.2238.
- 21] A. Demirhan, 'The effect of feature selection on multivariate pattern analysis of structural brain MR images', *Physica Medica*, vol. 47, pp. 103–111, Mar. 2018, doi: 10.1016/j.ejmp.2018.03.002.
- 22] S. Tummala, 'Deep Learning Framework using Siamese Neural Network for Diagnosis of Autism from Brain Magnetic Resonance Imaging', in *2021 6th International Conference for Convergence in Technology (I2CT)*, Apr. 2021, pp. 1–5. doi: 10.1109/I2CT51068.2021.9418143.
- 23] R. Nur Syahindah Husna, A. R. Syafeeza, N. Abdul Hamid, Y. C. Wong, and R. Atikah Raihan, 'Functional Magnetic Resonance Imaging for Autism Spectrum Disorder Detection Using Deep Learning', *J Teknol*, vol. 83, no. 3, pp. 45–52, Apr. 2021, doi: 10.11113/jurnalteknologi.v83.16389.
- 24] X. Guo *et al.*, 'Diagnosing autism spectrum disorder in children using conventional MRI and apparent diffusion coefficient based deep learning algorithms', *Eur Radiol*, vol. 32, no. 2, pp. 761–770, Feb. 2022, doi: 10.1007/s00330-021-08239-4.
- 25] H. Shahamat and M. Saniee Abadeh, 'Brain MRI analysis using a deep learning based evolutionary approach', *Neural Networks*, vol. 126, pp. 218–234, Jun. 2020, doi: 10.1016/j.neunet.2020.03.017.
- 26] X. Chen, Z. Wang, F. A. Cheikh, and M. Ullah, '3D-Resnet Fused Attention for Autism Spectrum Disorder Classification', in *Image and Graphics*, 2021, pp. 607–617. doi: 10.1007/978-3-030-87358-5\_49.
- 27] F. Ke, S. Choi, Y. H. Kang, K.-A. Cheon, and S. W. Lee, 'Exploring the Structural and Strategic Bases of Autism Spectrum Disorders With Deep Learning', *IEEE Access*, vol. 8, pp. 153341–153352, 2020, doi: 10.1109/ACCESS.2020.3016734.
- 28] C.-Y. Wee, L. Wang, F. Shi, P.-T. Yap, and D. Shen, 'Diagnosis of autism spectrum disorders using regional and interregional morphological features', *Hum Brain Mapp*, vol. 35, no. 7, pp. 3414–3430, Jul. 2014, doi: 10.1002/hbm.22411.
- 29] S. Haar, S. Berman, M. Behrmann, and I. Dinstein, 'Anatomical Abnormalities in Autism?', *Cerebral Cortex*, vol. 26, no. 4, pp. 1440–1452, Apr. 2016, doi: 10.1093/cercor/bhu242.
- 30] W. H. L. Pinaya, A. Mechelli, and J. R. Sato, 'Using deep autoencoders to identify abnormal brain structural patterns in neuropsychiatric disorders: A large-scale multi-sample study', *Hum Brain Mapp*, vol. 40, no. 3, pp. 944–954, Feb. 2019, doi: 10.1002/hbm.24423.
- 31] E. P. K. Pua, G. Ball, C. Adamson, S. Bowden, and M. L. Seal, 'Quantifying individual differences in brain morphometry underlying symptom severity in Autism Spectrum Disorders', *Sci Rep*, vol. 9, no. 1, p. 9898, Dec. 2019, doi: 10.1038/s41598-019-45774-z.
- 32] G. J. Katuwal, N. D. Cahill, S. A. Baum, and A. M. Michael, 'The predictive power of structural MRI in Autism diagnosis', in *2015 37th Annual International Conference of the IEEE Engineering in Medicine and Biology Society (EMBC)*, Aug. 2015, pp. 4270–4273. doi: 10.1109/EMBC.2015.7319338.
- 33] M. Mishra and U. C. Pati, 'Autism Spectrum Disorder Detection using Surface Morphometric Feature of sMRI in Machine Learning', in *2021 8th International Conference on Smart Computing and Communications (ICSCC)*, Jul. 2021, pp. 17–20. doi: 10.1109/ICSCC51209.2021.9528240.
- 34] M. T. Ali *et al.*, 'Autism Classification Using SMRI: A Recursive Features Selection Based on Sampling from Multi-Level High Dimensional Spaces', in *2021 IEEE 18th International Symposium on Biomedical Imaging (ISBI)*, Apr. 2021, pp. 267–270. doi: 10.1109/ISBI48211.2021.9433973.
- 35] H. Sharif and R. A. Khan, 'A novel machine learning based framework for detection of Autism Spectrum Disorder (ASD)', *arXiv preprint arXiv:1903.11323*, Mar. 2019, doi: 10.1080/08839514.2021.2004655.
- 36] H. C. Hazlett *et al.*, 'Early brain development in infants at high risk for autism spectrum disorder', *Nature*, vol. 542, no. 7641, pp. 348–351, Feb. 2017, doi: 10.1038/nature21369.
- 37] M. T. Ali *et al.*, 'The Role of Structure MRI in Diagnosing Autism', *Diagnostics*, vol. 12, no. 1, p. 165, Jan. 2022, doi: 10.3390/diagnostics12010165.
- 38] M. R. Sabuncu and E. Konukoglu, 'Clinical Prediction from Structural Brain MRI Scans: A Large-Scale Empirical Study', *Neuroinformatics*, vol. 13, no. 1, pp. 31–46, Jan. 2015, doi: 10.1007/s12021-014-9238-1.

- [9] E. Ferrari *et al.*, 'Dealing with confounders and outliers in classification medical studies: The Autism Spectrum Disorders case study', *Artif Intell Med*, vol. 108, p. 101926, Aug. 2020, doi: 10.1016/j.artmed.2020.101926.
- [10] I. Gori *et al.*, 'Gray Matter Alterations in Young Children with Autism Spectrum Disorders: Comparing Morphometry at the Voxel and Regional Level', *Journal of Neuroimaging*, vol. 25, no. 6, pp. 866–874, Nov. 2015, doi: 10.1111/jon.12280.
- [11] J. Germann *et al.*, 'Involvement of the habenula in the pathophysiology of autism spectrum disorder', *Sci Rep*, vol. 11, no. 1, p. 21168, Dec. 2021, doi: 10.1038/s41598-021-00603-0.
- [12] G. Li, M. Liu, Q. Sun, D. Shen, and L. Wang, 'Early Diagnosis of Autism Disease by Multi-channel CNNs', in *Mach Learn Med Imaging*, vol. 11046, 2018, pp. 303–309. doi: 10.1007/978-3-030-00919-9\_35.
- [13] T. Chen *et al.*, 'The Development of a Practical Artificial Intelligence Tool for Diagnosing and Evaluating Autism Spectrum Disorder: Multicenter Study', *JMIR Med Inform*, vol. 8, no. 5, p. e15767, May 2020, doi: 10.2196/15767.
- [14] X. Zhang *et al.*, 'Siamese Verification Framework for Autism Identification During Infancy Using Cortical Path Signature Features', in *2020 IEEE 17th International Symposium on Biomedical Imaging (ISBI)*, Apr. 2020, pp. 1–4. doi: 10.1109/ISBI45749.2020.9098385.
- [15] C. Alvarez-Jimenez, N. Múnera-Garzón, M. A. Zuluaga, N. F. Velasco, and E. Romero, 'Autism spectrum disorder characterization in children by capturing local-regional brain changes in MRI', *Med Phys*, vol. 47, no. 1, pp. 119–131, Jan. 2020, doi: 10.1002/mp.13901.
- [16] E. Varol, B. Gaonkar, G. Erus, R. Schultz, and C. Davatzikos, 'Feature ranking based nested support vector machine ensemble for medical image classification', in *2012 9th IEEE International Symposium on Biomedical Imaging (ISBI)*, May 2012, pp. 146–149. doi: 10.1109/ISBI.2012.6235505.
- [17] R. Yang, F. Ke, H. Liu, M. Zhou, and H.-M. Cao, 'Exploring sMRI Biomarkers for Diagnosis of Autism Spectrum Disorders Based on Multi Class Activation Mapping Models', *IEEE Access*, vol. 9, pp. 124122–124131, 2021, doi: 10.1109/ACCESS.2021.3069211.
- [18] J. Gao *et al.*, 'Multisite Autism Spectrum Disorder Classification Using Convolutional Neural Network Classifier and Individual Morphological Brain Networks', *Front Neurosci*, vol. 14, p. 629630, Jan. 2021, doi: 10.3389/fnins.2020.629630.
- [19] M. Madine, I. Rekik, and N. Werghi, 'Diagnosing Autism Using T1-W MRI With Multi-Kernel Learning and Hypergraph Neural Network', in *2020 IEEE International Conference on Image Processing (ICIP)*, Oct. 2020, pp. 438–442. doi: 10.1109/ICIP40778.2020.9190924.
- [20] M. Soussia and I. Rekik, 'Unsupervised Manifold Learning Using High-Order Morphological Brain Networks Derived From T1-w MRI for Autism Diagnosis', *Front Neuroinform*, vol. 12, p. 70, Oct. 2018, doi: 10.3389/fninf.2018.00070.
- [21] N. Georges, I. Mhiri, and I. Rekik, 'Identifying the best data-driven feature selection method for boosting reproducibility in classification tasks', *Pattern Recognit*, vol. 101, p. 107183, May 2020, doi: 10.1016/j.patcog.2019.107183.
- [22] G. Chanel, S. Pichon, L. Conty, S. Berthoz, C. Chevallier, and J. Grèzes, 'Classification of autistic individuals and controls using cross-task characterization of fMRI activity', *Neuroimage Clin*, vol. 10, pp. 78–88, 2016, doi: 10.1016/j.nicl.2015.11.010.
- [23] P. Odriozola, L. Q. Uddin, C. J. Lynch, J. Kochalka, T. Chen, and V. Menon, 'Insula response and connectivity during social and non-social attention in children with autism', *Soc Cogn Affect Neurosci*, vol. 11, no. 3, pp. 433–444, Mar. 2016, doi: 10.1093/scan/nsv126.
- [24] M. A. Just, V. L. Cherkassky, A. Buchweitz, T. A. Keller, and T. M. Mitchell, 'Identifying Autism from Neural Representations of Social Interactions: Neurocognitive Markers of Autism', *PLoS One*, vol. 9, no. 12, p. e113879, Dec. 2014, doi: 10.1371/journal.pone.0113879.
- [25] X. Li, N. C. Dvornek, J. Zhuang, P. Ventola, and J. S. Duncan, 'Brain Biomarker Interpretation in ASD Using Deep Learning and fMRI', in *Med Image Comput Comput Assist Interv*, vol. 11072, 2018, pp. 206–214. doi: 10.1007/978-3-030-00931-1\_24.
- [26] X. Li *et al.*, 'BrainGNN: Interpretable Brain Graph Neural Network for fMRI Analysis', *Med Image Anal*, vol. 74, p. 102233, Dec. 2021, doi: 10.1016/j.media.2021.102233.
- [27] X. Li, N. C. Dvornek, Y. Zhou, J. Zhuang, P. Ventola, and J. S. Duncan, 'Graph Neural Network for Interpreting Task-fMRI Biomarkers', in *Med Image Comput Comput Assist Interv*, vol. 11768, 2019, pp. 485–493. doi: 10.1007/978-3-030-32254-0\_54.

- [8] X. Li *et al.*, '2-Channel convolutional 3D deep neural network (2CC3D) for fMRI analysis: ASD classification and feature learning', in *2018 IEEE 15th International Symposium on Biomedical Imaging (ISBI 2018)*, Apr. 2018, pp. 1252–1255. doi: 10.1109/ISBI.2018.8363798.
- [9] N. C. Dvornek, D. Yang, P. Ventola, and J. S. Duncan, 'Learning Generalizable Recurrent Neural Networks from Small Task-fMRI Datasets', in *Med Image Comput Comput Assist Interv*, vol. 11072, 2018, pp. 329–337. doi: 10.1007/978-3-030-00931-1\_38.
- [0] D. L. Murdaugh, S. V. Shinkareva, H. R. Deshpande, J. Wang, M. R. Pennick, and R. K. Kana, 'Differential Deactivation during Mentalizing and Classification of Autism Based on Default Mode Network Connectivity', *PLoS One*, vol. 7, no. 11, p. e50064, Nov. 2012, doi: 10.1371/journal.pone.0050064.
- [1] H. Wang, C. Chen, and H. Fushing, 'Extracting Multiscale Pattern Information of fMRI Based Functional Brain Connectivity with Application on Classification of Autism Spectrum Disorders', *PLoS One*, vol. 7, no. 10, p. e45502, Oct. 2012, doi: 10.1371/journal.pone.0045502.
- [2] R. Haweel *et al.*, 'Functional Magnetic Resonance Imaging Based Framework for Autism Diagnosis', in *2019 Fifth International Conference on Advances in Biomedical Engineering (ICABME)*, Oct. 2019, pp. 1–4. doi: 10.1109/ICABME47164.2019.8940348.
- [3] R. Haweel *et al.*, 'A robust DWT–CNN-based CAD system for early diagnosis of autism using task-based fMRI', *Med Phys*, vol. 48, no. 5, pp. 2315–2326, May 2021, doi: 10.1002/mp.14692.
- [4] R. Haweel *et al.*, 'A Novel DWT-Based Discriminant Features Extraction From Task-Based Fmri: An Asd Diagnosis Study Using Cnn', in *2021 IEEE 18th International Symposium on Biomedical Imaging (ISBI)*, Apr. 2021, pp. 196–199. doi: 10.1109/ISBI48211.2021.9433768.
- [5] R. Haweel, N. Seada, S. Ghoniemy, N. S. Alghamdi, and A. El-Baz, 'A CNN Deep Local and Global ASD Classification Approach with Continuous Wavelet Transform Using Task-Based FMRI', *Sensors*, vol. 21, no. 17, p. 5822, Aug. 2021, doi: 10.3390/s21175822.
- [6] L. Xu *et al.*, 'Characterizing autism spectrum disorder by deep learning spontaneous brain activity from functional near-infrared spectroscopy', *J Neurosci Methods*, vol. 331, p. 108538, Feb. 2020, doi: 10.1016/j.jneumeth.2019.108538.
- [7] L. Xu, X. Geng, X. He, J. Li, and J. Yu, 'Prediction in Autism by Deep Learning Short-Time Spontaneous Hemodynamic Fluctuations', *Front Neurosci*, vol. 13, p. 1120, Nov. 2019, doi: 10.3389/fnins.2019.01120.
- [8] J. Li, L. Qiu, L. Xu, E. V. Pedapati, C. A. Erickson, and U. Sunar, 'Characterization of autism spectrum disorder with spontaneous hemodynamic activity', *Biomed Opt Express*, vol. 7, no. 10, p. 3871, Oct. 2016, doi: 10.1364/BOE.7.003871.
- [9] A. Crippa *et al.*, 'Use of Machine Learning to Identify Children with Autism and Their Motor Abnormalities', *J Autism Dev Disord*, vol. 45, no. 7, pp. 2146–2156, Jul. 2015, doi: 10.1007/s10803-015-2379-8.
- [0] Z. Zhao *et al.*, 'Identifying Autism with Head Movement Features by Implementing Machine Learning Algorithms', *J Autism Dev Disord*, vol. 52, no. 7, pp. 3038–3049, Jul. 2022, doi: 10.1007/s10803-021-05179-2.
- [1] Z. Zhao *et al.*, 'Applying Machine Learning to Identify Autism With Restricted Kinematic Features', *IEEE Access*, vol. 7, pp. 157614–157622, 2019, doi: 10.1109/ACCESS.2019.2950030.
- [2] W. Li, Z. Wang, L. Zhang, L. Qiao, and D. Shen, 'Remodeling Pearson's Correlation for Functional Brain Network Estimation and Autism Spectrum Disorder Identification', *Front Neuroinform*, vol. 11, p. 55, Aug. 2017, doi: 10.3389/fninf.2017.00055.
- [3] A. Anzulewicz, K. Sobota, and J. T. Delafield-Butt, 'Toward the Autism Motor Signature: Gesture patterns during smart tablet gameplay identify children with autism', *Sci Rep*, vol. 6, no. 1, p. 31107, Aug. 2016, doi: 10.1038/srep31107.
- [4] W. Liu, T. Zhou, C. Zhang, X. Zou, and M. Li, 'Response to name: A dataset and a multimodal machine learning framework towards autism study', in *2017 Seventh International Conference on Affective Computing and Intelligent Interaction (ACII)*, Oct. 2017, pp. 178–183. doi: 10.1109/ACII.2017.8273597.
- [5] Q. Tariq, J. Daniels, J. N. Schwartz, P. Washington, H. Kalantarian, and D. P. Wall, 'Mobile detection of autism through machine learning on home video: A development and prospective validation study', *PLoS Med*, vol. 15, no. 11, p. e1002705, Nov. 2018, doi: 10.1371/journal.pmed.1002705.
- [6] C. Wu *et al.*, 'Machine Learning Based Autism Spectrum Disorder Detection from Videos', in *2020 IEEE International Conference on E-health Networking, Application & Services (HEALTHCOM)*, Mar. 2021, vol. 2020, pp. 1–6. doi: 10.1109/HEALTHCOM49281.2021.9398924.



- [7] M. Ruan, 'Image and Video-Based Autism Spectrum Disorder Detection via Deep Learning', Benjamin M. Statler College of Engineering and Mineral Resources, Morgantown, West Virginia, 2020.
- [8] M. J. Maenner, M. Yeargin-Allsopp, K. Van Naarden Braun, D. L. Christensen, and L. A. Schieve, 'Development of a Machine Learning Algorithm for the Surveillance of Autism Spectrum Disorder', *PLoS One*, vol. 11, no. 12, p. e0168224, Dec. 2016, doi: 10.1371/journal.pone.0168224.
- [9] E. Duchesnay *et al.*, 'Feature selection and classification of imbalanced datasets', *Neuroimage*, vol. 57, no. 3, pp. 1003–1014, Aug. 2011, doi: 10.1016/j.neuroimage.2011.05.011.
- [0] S. Liu, F. Ge, L. Zhao, T. Wang, D. Ni, and T. Liu, 'NAS-optimized topology-preserving transfer learning for differentiating cortical folding patterns', *Med Image Anal*, vol. 77, p. 102316, Apr. 2022, doi: 10.1016/j.media.2021.102316.
- [1] M. Rakić, M. Cabezas, K. Kushibar, A. Oliver, and X. Lladó, 'Improving the detection of autism spectrum disorder by combining structural and functional MRI information', *Neuroimage Clin*, vol. 25, p. 102181, 2020, doi: 10.1016/j.nicl.2020.102181.
- [2] O. Dekhil *et al.*, 'A Personalized Autism Diagnosis CAD System Using a Fusion of Structural MRI and Resting-State Functional MRI Data', *Front Psychiatry*, vol. 10, p. 392, Jul. 2019, doi: 10.3389/fpsyt.2019.00392.
- [3] S. Itani and D. Thanou, 'Combining anatomical and functional networks for neuropathology identification: A case study on autism spectrum disorder', *Med Image Anal*, vol. 69, p. 101986, Apr. 2021, doi: 10.1016/j.media.2021.101986.
- [4] O. Dekhil *et al.*, 'A Comprehensive Framework for Differentiating Autism Spectrum Disorder From Neurotypicals by Fusing Structural MRI and Resting State Functional MRI', *Semin Pediatr Neurol*, vol. 34, p. 100805, Jul. 2020, doi: 10.1016/j.spen.2020.100805.
- [5] Y. Chen *et al.*, 'Attention-Based Node-Edge Graph Convolutional Networks for Identification of Autism Spectrum Disorder Using Multi-Modal MRI Data', in *Pattern Recognition and Computer Vision*, 2021, pp. 374–385. doi: 10.1007/978-3-030-88010-1\_31.
- [6] Y. Zhou, F. Yu, and T. Duong, 'Multiparametric MRI Characterization and Prediction in Autism Spectrum Disorder Using Graph Theory and Machine Learning', *PLoS One*, vol. 9, no. 6, p. e90405, Jun. 2014, doi: 10.1371/journal.pone.0090405.
- [7] M. Akhavan Aghdam, A. Sharifi, and M. M. Pedram, 'Combination of rs-fMRI and sMRI Data to Discriminate Autism Spectrum Disorders in Young Children Using Deep Belief Network', *J Digit Imaging*, vol. 31, no. 6, pp. 895–903, Dec. 2018, doi: 10.1007/s10278-018-0093-8.
- [8] B. Sen, N. C. Borle, R. Greiner, and M. R. G. Brown, 'A general prediction model for the detection of ADHD and Autism using structural and functional MRI', *PLoS One*, vol. 13, no. 4, p. e0194856, Apr. 2018, doi: 10.1371/journal.pone.0194856.
- [9] K. M and S. Jaganathan, 'Graph Convolutional Model to Diagnose Autism Spectrum Disorder Using Rs-Fmri Data', in *2021 5th International Conference on Computer, Communication and Signal Processing (ICCCSP)*, May 2021, pp. 1–5. doi: 10.1109/ICCCSP52374.2021.9465490.
- [0] A. Brahim and N. Farrugia, 'Graph Fourier transform of fMRI temporal signals based on an averaged structural connectome for the classification of neuroimaging', *Artif Intell Med*, vol. 106, p. 101870, Jun. 2020, doi: 10.1016/j.artmed.2020.101870.
- [1] A. Eill *et al.*, 'Functional Connectivities Are More Informative Than Anatomical Variables in Diagnostic Classification of Autism', *Brain Connect*, vol. 9, no. 8, pp. 604–612, Oct. 2019, doi: 10.1089/brain.2019.0689.
- [2] A. Crimi, L. Doderò, V. Murino, and D. Sona, 'Case-control discrimination through effective brain connectivity', in *2017 IEEE 14th International Symposium on Biomedical Imaging (ISBI 2017)*, Apr. 2017, pp. 970–973. doi: 10.1109/ISBI.2017.7950677.
- [3] G. Deshpande, L. E. Libero, K. R. Sreenivasan, H. D. Deshpande, and R. K. Kana, 'Identification of neural connectivity signatures of autism using machine learning', *Front Hum Neurosci*, vol. 7, p. 670, 2013, doi: 10.3389/fnhum.2013.00670.
- [4] A. Irimia, X. Lei, C. M. Torgerson, Z. J. Jacokes, S. Abe, and J. D. Van Horn, 'Support Vector Machines, Multidimensional Scaling and Magnetic Resonance Imaging Reveal Structural Brain Abnormalities Associated With the Interaction Between Autism Spectrum Disorder and Sex', *Front Comput Neurosci*, vol. 12, p. 93, Nov. 2018, doi: 10.3389/fncom.2018.00093.
- [5] J. I. Kim *et al.*, 'Classification of Preschoolers with Low-Functioning Autism Spectrum Disorder Using Multimodal MRI Data', *J Autism Dev Disord*, Jan. 2022, doi: 10.1007/s10803-021-05368-z.

- 16] C. J. Goch *et al.*, 'Global Changes in the Connectome in Autism Spectrum Disorders', in *Computational Diffusion MRI and Brain Connectivity*, Springer, 2014, pp. 239–247. doi: 10.1007/978-3-319-02475-2\_22.
- 17] S. Payabvash *et al.*, 'White Matter Connectome Edge Density in Children with Autism Spectrum Disorders: Potential Imaging Biomarkers Using Machine-Learning Models', *Brain Connect*, vol. 9, no. 2, pp. 209–220, Mar. 2019, doi: 10.1089/brain.2018.0658.
- 18] S. Thapaliya, S. Jayarathna, and M. Jaime, 'Evaluating the EEG and Eye Movements for Autism Spectrum Disorder', in *2018 IEEE International Conference on Big Data (Big Data)*, Dec. 2018, pp. 2328–2336. doi: 10.1109/BigData.2018.8622501.
- 19] S. Zhang, D. Chen, Y. Tang, and L. Zhang, 'Children ASD Evaluation Through Joint Analysis of EEG and Eye-Tracking Recordings With Graph Convolution Network', *Front Hum Neurosci*, vol. 15, p. 651349, May 2021, doi: 10.3389/fnhum.2021.651349.
- 20] J. Kang, X. Han, J. Song, Z. Niu, and X. Li, 'The identification of children with autism spectrum disorder by SVM approach on EEG and eye-tracking data', *Comput Biol Med*, vol. 120, p. 103722, May 2020, doi: 10.1016/j.combiomed.2020.103722.
- 21] P. Lu, X. Li, L. Hu, and L. Lu, 'Integrating genomic and resting State fMRI for efficient autism spectrum disorder classification', *Multimed Tools Appl*, vol. 81, no. 14, pp. 19183–19194, Jun. 2022, doi: 10.1007/s11042-020-10473-9.
- 22] A. Vabalas, E. Gowen, E. Poliakoff, and A. J. Casson, 'Applying Machine Learning to Kinematic and Eye Movement Features of a Movement Imitation Task to Predict Autism Diagnosis', *Sci Rep*, vol. 10, no. 1, p. 8346, Dec. 2020, doi: 10.1038/s41598-020-65384-4.
- 23] L. E. Libero, T. P. DeRamus, A. C. Lahti, G. Deshpande, and R. K. Kana, 'Multimodal neuroimaging based classification of autism spectrum disorder using anatomical, neurochemical, and white matter correlates', *Cortex*, vol. 66, pp. 46–59, May 2015, doi: 10.1016/j.cortex.2015.02.008.
