# Supplementary material for: Automated diagnosis of autism: State of the art
Source: bioRxiv or medRxiv preprint supplement (doi:10.1101/2021.06.29.21254249), 2023-03-29
Supplement: Supplementary file [file media-3.pdf]

# Multimedia Appendix 3: Results of SCS meta-analyses

| Feature set                                                    | # Studies | N     | Acc       | SCS (95% CI)     |                  | Feature set                                                                                     | # Studies | N     | Acc     | SCS (95% CI)     |                  |
|----------------------------------------------------------------|-----------|-------|-----------|------------------|------------------|-------------------------------------------------------------------------------------------------|-----------|-------|---------|------------------|------------------|
|                                                                |           |       |           | Sen              | Spe              |                                                                                                 |           |       |         | Sen              | Spe              |
| <b>rs-fMRI</b>                                                 |           |       |           |                  |                  |                                                                                                 |           |       |         |                  |                  |
| 3D fMRI                                                        | 2         | 222   | 81-94.7   | -                | -                | Non-oscillatory connectivity                                                                    | 1         | 72    | 80      | -                | -                |
| Dynamic functional connectivity                                | 18        | 7081  | -         | 0.74 (0.67-0.79) | 0.74 (0.68-0.79) | Normalized image                                                                                | 1         | 172   | 57.8    | -                | -                |
| Effective connectivity                                         | 2         | 340   | 69-87     | -                | -                | Power spectral density                                                                          | 2         | 481   | 92-96.2 | -                | -                |
| Graph metrics                                                  | 19        | 11913 | -         | 0.74 (0.69-0.78) | 0.69 (0.64-0.74) | ROI-based functional connectivity                                                               | 55        | 39697 | -       | 0.74 (0.69-0.79) | 0.76 (0.71-0.81) |
| Graph metrics + Clinical data                                  | 1         | 575   | 74.5      | -                | -                | ROI-based functional connectivity + Amplitude of low-frequency fluctuation                      | 1         | 184   | 68.5    | -                | -                |
| High-order functional connectivity                             | 4         | 1648  | 68.8-81   | -                | -                | ROI-based functional connectivity + Clinical data                                               | 2         | 1209  | 65-73.2 | -                | -                |
| Histogram of oriented gradients + Clinical data                | 1         | 1111  | 65        | -                | -                | ROI-based functional connectivity + Clinical data + Information theory                          | 1         | 871   | 72.5    | -                | -                |
| Independent components                                         | 3         | 1023  | 77.7-89.5 | -                | -                | Wavelet-based dynamics features                                                                 | 1         | 54    | 86.7    | -                | -                |
| <b>S-MRI</b>                                                   |           |       |           |                  |                  |                                                                                                 |           |       |         |                  |                  |
| Cortical thickness                                             | 3         | 154   | 84.2-90   | -                | -                | Surface-based morphological features + Cortical thickness                                       | 2         | 934   | 60-96.3 | -                | -                |
| Curvelet sub-bands                                             | 1         | 151   | 75        | -                | -                | Surface-based morphological features + Clinical data                                            | 1         | 50    | 88      | -                | -                |
| Histogram of oriented gradients                                | 1         | 250   | 65        | -                | -                | Surface-based morphological features + Volume-based morphological features + Cortical thickness | 2         | 220   | 93.8    | -                | -                |
| Histogram of oriented gradients + Clinical data                | 1         | 1111  | 64.1      | -                | -                | Volume-based morphological features                                                             | 8         | 1251  | -       | 0.81 (0.69-0.89) | 0.83 (0.71-0.90) |
| Normalized image                                               | 3         | 1561  | 71-99     | -                | -                | Volume-based morphological features + Clinical data                                             | 1         | 523   | 64      | -                | -                |
| Path signature + Clinical data                                 | 1         | 60    | 87        | -                | -                | Volume-based morphological features + Cortical thickness                                        | 1         | 117   | 96.3    | -                | -                |
| Structural covariance network                                  | 1         | 1085  | 71.8      | -                | -                | Volume-based morphological features + Voxel density                                             | 1         | 58    | 82      | -                | -                |
| Surface-based morphological features                           | 3         | 1125  | 75-83     | -                | -                | Voxel density                                                                                   | 1         | 131   | 73.3    | -                | -                |
| <b>EEG</b>                                                     |           |       |           |                  |                  |                                                                                                 |           |       |         |                  |                  |
| Complex networks                                               | 2         | 84    | 81.7-94.7 | -                | -                | Event-related potentials                                                                        | 3         | 253   | 70-90.4 | -                | -                |
| Entropy + Frequency-domain + Time-domain + Non-linear features | 1         | 98    | 97.9      | -                | -                | Frequency-domain + Non-linear features                                                          | 1         | 28    | 78.5    | -                | -                |
| Entropy + Frequency-domain features                            | 4         | 488   | 86-99.7   | -                | -                | Frequency-domain features                                                                       | 6         | 313   | -       | 0.98 (0.93-0.99) | 0.93 (0.84-0.97) |
| Entropy + Non-linear features                                  | 3         | 178   | 90.2-97   | -                | -                | Non-linear features                                                                             | 1         | 61    | 82      | -                | -                |
| <b>Eye tracking</b>                                            |           |       |           |                  |                  |                                                                                                 |           |       |         |                  |                  |
| Face-to-face conversations                                     | 1         | 39    | 92.3      | -                | -                | Virtual reality                                                                                 | 2         | 162   | 73-86   | -                | -                |
| Interactions with parents                                      | 1         | 32    | 93.8      | -                | -                | Watching faces                                                                                  | 1         | 77    | 88.5    | -                | -                |

|                                            |   |     |           |                  |                  |                                                                                              |   |       |           |                  |                  |
|--------------------------------------------|---|-----|-----------|------------------|------------------|----------------------------------------------------------------------------------------------|---|-------|-----------|------------------|------------------|
| Observing images                           | 2 | 67  | 59.3-92   | -                | -                | Watching videos                                                                              | 3 | 271   | 82-87.5   | -                | -                |
| Saliency maps                              | 4 | 169 | 62.1-99.8 | -                | -                | Watching websites                                                                            | 1 | 30    | 91.6      | -                | -                |
| <b>T-fMRI</b>                              |   |     |           |                  |                  |                                                                                              |   |       |           |                  |                  |
| Biological motion perception task          | 1 | 40  | 64.5      | -                | -                | Dynamic bodies attention task                                                                | 1 | 29    | 92.3      | -                | -                |
| Biopoint task                              | 2 | 233 | 76-79.8   | -                | -                | Language task                                                                                | 1 | 60    | 75.8      | -                | -                |
| Cognitive control task                     | 1 | 58  | 82.8      | -                | -                | Response to speech                                                                           | 3 | 266   | 77.2-86   | -                | -                |
| <b>DWI/DTI</b>                             |   |     |           |                  |                  |                                                                                              |   |       |           |                  |                  |
| Fiber density + Fiber bundle cross-section | 1 | 52  | 73.1      | -                | -                | Fractional anisotropy + Mean diffusivity + Axial diffusivity + Radial diffusivity + Skewness | 2 | 323   | 73-94.7   | -                | -                |
| Fractional anisotropy                      | 1 | 73  | 75.3      | -                | -                | Graph metrics                                                                                | 1 | 94    | 68        | -                | -                |
| Fractional anisotropy + Mean diffusivity   | 2 | 224 | 78.3-80   | -                | -                |                                                                                              |   |       |           |                  |                  |
| <b>Facial recognition</b>                  |   |     |           |                  |                  |                                                                                              |   |       |           |                  |                  |
| Facial attribute recognition               | 1 | 88  | 72.9      | -                | -                | Static facial features                                                                       | 5 | 12658 | -         | 0.90 (0.86-0.93) | 0.90 (0.86-0.93) |
| <b>Other modalities</b>                    |   |     |           |                  |                  |                                                                                              |   |       |           |                  |                  |
| Functional near-infrared spectroscopy      | 3 | 138 | 91.9-95.7 | -                | -                | Response to name                                                                             | 1 | 43    | 93        | -                | -                |
| Kinematic features                         | 5 | 225 | -         | 0.88 (0.78-0.94) | 0.91 (0.82-0.96) | Video analysis                                                                               | 2 | 361   | 82-88.9   | -                | -                |
| PET scan                                   | 1 | 58  | 88        | -                | -                | Vocal analysis                                                                               | 1 | 2612  | 86.5      | -                | -                |
| <b>Multimodal</b>                          |   |     |           |                  |                  |                                                                                              |   |       |           |                  |                  |
| EEG + Eye tracking                         | 1 | 42  | 95        | -                | -                | rs-fMRI + S-MRI                                                                              | 6 | 3356  | -         | 0.75 (0.56-0.88) | 0.68 (0.48-0.83) |
| Kinematic features + Eye tracking          | 1 | 44  | 78        | -                | -                | rs-fMRI + S-MRI + DWI/DTI                                                                    | 1 | 93    | 92.5      | -                | -                |
| rs-fMRI + DWI/DTI                          | 1 | 871 | 60.9      | -                | -                | S-MRI + DWI/DTI                                                                              | 4 | 378   | 75.3-93.3 | -                | -                |
| rs-fMRI + Genetic                          | 1 | 71  | 86        | -                | -                | T-fMRI + DWI/DTI + Clinical data                                                             | 1 | 30    | 95.9      | -                | -                |
